# Supplementary material for: The eating rate of bread predicted from its sensory texture and physical properties
Source: Royal Society of Chemistry journal article supplement (doi:10.1039/d4fo04297b), 2024-01-01
Supplement: d4fo04297b1.xlsx [file d4fo04297b1.xlsx]

## Sheet: Commercial breads
BlindingCode	Sample	Repliate	Height	Volume	Density	CrustCrumbRatio	HardnessCrumb	SpringinessCrumb	CohesivenessCrumb	ChewinessCrumb	ResilienceCrumb	AdhesivenessCrumb	HardnessCrust	Moisture content	WAC
645	Bread, wholemeal	1	1.3	112.978	0.173662	0.79	1389.97	0.979686	0.683851	931.222	0.260425	0.443962	1405.61	0.321667	1.1
645	Bread, wholemeal	2	1.4	112.094	0.167359	0.73	1399.08	1.00277	0.682051	956.883	0.260811	0.141695	1645.95	0.318644	1.13
645	Bread, wholemeal	3	1.3			0.78	1431.24	0.987307	0.686892	970.626	0.261805	0.235755	1138.65	0.34202	1.14
645	Bread, wholemeal	4	1.3				1022.23	0.998035	0.695362	709.424	0.263599	0.183182	890.826	0.340157	0.87
645	Bread, wholemeal	5					1516.27	0.974063	0.667259	985.506	0.260416	0.176048	1362.32	0.308108
645	Bread, wholemeal	6					1428.03	0.970974	0.688867	955.17	0.264738	0.187024	1103.82	0.314136
645	Bread, wholemeal	7					1321.81	0.95822	0.668021	846.105	0.25109	0.20442	1052.09
645	Bread, wholemeal	8					1330.44	0.975369	0.689384	894.591	0.263781	0.219511	1468.3
645	Bread, wholemeal	9					1173.39	1.00825	0.682715	807.697	0.256844	0.357968	1046.48
645	Bread, wholemeal	10					1589.32	0.939221	0.673265	1005	0.259301	0.23806	1499.48
645	Bread, wholemeal	11											759.486
645	Bread, wholemeal	12											577.05
645	Bread, wholemeal	13											891.682
645	Bread, wholemeal	14											761.352
645	Bread, wholemeal	15											708.456
645	Bread, wholemeal	16											596.296
645	Bread, wholemeal	17											454.317
645	Bread, wholemeal	18											433.38
645	Bread, wholemeal	19											1126.64
645	Bread, wholemeal	20											791.127
645	Bread, wholemeal	21
645	Bread, wholemeal	22
645	Bread, wholemeal	23
645	Bread, wholemeal	24
645	Bread, wholemeal	25
645	Bread, wholemeal	26
645	Bread, wholemeal	27
645	Bread, wholemeal	28
645	Bread, wholemeal	29
645	Bread, wholemeal	30
645	Bread, wholemeal	31
645	Bread, wholemeal	32
645	Bread, wholemeal	33
645	Bread, wholemeal	34
645	Bread, wholemeal	35
645	Bread, wholemeal	36
123	Bread, brown	1	1.3	108.988	0.157449	0.77	1140.34	0.973399	0.695235	771.714	0.259888	0.380468	561.756	0.282143	0.9
123	Bread, brown	2	1.4	115.716	0.165577	0.77	1272.57	0.960728	0.687342	840.341	0.259809	-0.060201	581.046	0.292543	1.14
123	Bread, brown	3	1.4			0.72	1484.47	0.968566	0.672567	967.019	0.257535	0.172042	631.505	0.3049	1.09
123	Bread, brown	4	1.3				852.571	0.997947	0.707964	602.35	0.265453	0.187188	1871.45	0.31016	0.9
123	Bread, brown	5					1078	0.966249	0.679134	707.395	0.250818	0.151079	860.239	0.290566
123	Bread, brown	6					1020.95	0.954071	0.6989	680.768	0.265216	-0.00861582	755.907	0.290146
123	Bread, brown	7					1021.43	0.999007	0.692181	706.312	0.257587	0.114146	1136.64
123	Bread, brown	8					983.762	0.983003	0.670792	648.683	0.241647	0.397919	1687.41
123	Bread, brown	9					1079.91	0.976908	0.676436	713.62	0.251754	0.117878	1160.31
123	Bread, brown	10					942.625	1.01385	0.694162	663.395	0.244711	0.472992	1370.82
123	Bread, brown	11											627.629
123	Bread, brown	12											714.934
123	Bread, brown	13											727.34
123	Bread, brown	14											731.182
123	Bread, brown	15											582.243
123	Bread, brown	16											687.409
123	Bread, brown	17											396.469
123	Bread, brown	18											861.82
123	Bread, brown	19											757.872
123	Bread, brown	20											745.817
123	Bread, brown	21
123	Bread, brown	22
123	Bread, brown	23
123	Bread, brown	24
123	Bread, brown	25
123	Bread, brown	26
123	Bread, brown	27
123	Bread, brown	28
123	Bread, brown	29
123	Bread, brown	30
123	Bread, brown	31
123	Bread, brown	32
123	Bread, brown	33
123	Bread, brown	34
123	Bread, brown	35
123	Bread, brown	36
489	Bread, white	1	1.2	104.703	0.156825	0.91	838.445	0.98369	0.696708	574.624	0.256564	0.350669	1222.48	0.270042	0.83
489	Bread, white	2	1.3	107.073	0.15905	0.82	729.809	0.978958	0.688193	491.681	0.229947	0.140377	990.383	0.263598	0.84
489	Bread, white	3	1.2			0.85	919.478	1	0.67338	619.158	0.23119	0.0166829	848.525	0.298211	0.87
489	Bread, white	4	1.3				774.524	1.3211	0.723042	739.834	0.259004	0.191249	682.579	0.284464	0.87
489	Bread, white	5					901.061	0.985873	0.675347	599.932	0.23703	0.158707	1345.43	0.261477
489	Bread, white	6					940.913	0.981013	0.673093	621.297	0.243659	0.339145	1464.98	0.266667
489	Bread, white	7					830.993	0.979853	0.670577	546.018	0.227621	0.18642	1056.96
489	Bread, white	8					801.491	0.953532	0.680191	519.834	0.227207	0.303035	890.398
489	Bread, white	9					1111.74	0.971618	0.659531	712.414	0.233354	0.277572	671.798
489	Bread, white	10					831.575	0.974212	0.689987	558.979	0.231042	0.279548	1742.11
489	Bread, white	11											585.207
489	Bread, white	12											569.727
489	Bread, white	13											552.457
489	Bread, white	14											653.606
489	Bread, white	15											686.224
489	Bread, white	16											786.637
489	Bread, white	17											568.64
489	Bread, white	18											655.724
489	Bread, white	19											537.229
489	Bread, white	20											925.651
489	Bread, white	21
489	Bread, white	22
489	Bread, white	23
489	Bread, white	24
489	Bread, white	25
489	Bread, white	26
489	Bread, white	27
489	Bread, white	28
489	Bread, white	29
489	Bread, white	30
489	Bread, white	31
489	Bread, white	32
489	Bread, white	33
489	Bread, white	34
489	Bread, white	35
489	Bread, white	36
840	Hard bun, brown	1	5.1	162.819	0.232037	1.7	2184.11	0.51607	0.614845	693.023	0.239391	-4.72175	626.674	0.272069	1.04
840	Hard bun, brown	2	4.7	172.964	0.234963	1.64	1598.5	0.431698	0.605551	417.872	0.238759	-8.68795	760.254	0.235521	0.89
840	Hard bun, brown	3	4.8			1.63	1525.05	0.480911	0.612207	449	0.23555	-4.37974	884.052	0.261682	0.84
840	Hard bun, brown	4	5.1				1154.38	0.478737	0.597013	329.936	0.2158	-5.18646	693.744	0.256324	1.14
840	Hard bun, brown	5					1758.66	0.495383	0.630159	549	0.245659	-3.27267	744.401	0.272201
840	Hard bun, brown	6					1817.97	0.535189	0.631313	614.242	0.257106	-0.741284	994.225	0.268997
840	Hard bun, brown	7					1436.34	0.548193	0.623524	490.958	0.230877	0.145863	731.808
840	Hard bun, brown	8					1861.16	0.462963	0.605973	522.137	0.246155	-3.05045	568.508
840	Hard bun, brown	9					1537.31	0.504909	0.634672	492.634	0.246734	0.196204	1435.36
840	Hard bun, brown	10					1840.52	0.522101	0.640225	615.217	0.24838	0.141252	694.908
840	Hard bun, brown	11											846.373
840	Hard bun, brown	12											725.166
840	Hard bun, brown	13											771.793
840	Hard bun, brown	14											829.981
840	Hard bun, brown	15											932.074
840	Hard bun, brown	16											754.457
840	Hard bun, brown	17											618.813
840	Hard bun, brown	18											1005.64
840	Hard bun, brown	19											860.118
840	Hard bun, brown	20											856.616
840	Hard bun, brown	21
840	Hard bun, brown	22
840	Hard bun, brown	23
840	Hard bun, brown	24
840	Hard bun, brown	25
840	Hard bun, brown	26
840	Hard bun, brown	27
840	Hard bun, brown	28
840	Hard bun, brown	29
840	Hard bun, brown	30
840	Hard bun, brown	31
840	Hard bun, brown	32
840	Hard bun, brown	33
840	Hard bun, brown	34
840	Hard bun, brown	35
840	Hard bun, brown	36
286	Hard bun, white	1	4.9	142.838	0.258474	1.84	2188	0.5686	0.66285	824.65	0.270139	-3.93402	751.032	0.255183	1
286	Hard bun, white	2	5.7	145.636	0.258247	1.75	1509.05	0.833558	0.692847	871.519	0.248128	-0.0270646	724.99	0.259207	1.04
286	Hard bun, white	3	4.7			1.25	2202.64	0.68813	0.657751	996.955	0.27071	-7.17875	1068.23	0.255121	0.97
286	Hard bun, white	4	5.2				2009.68	0.663023	0.712344	949.175	0.280673	-2.43554	1919.09	0.267564	1.01
286	Hard bun, white	5					1687.95	0.821954	0.676524	938.622	0.243245	-3.0001	1592.42	0.255462
286	Hard bun, white	6					1095.96	0.762803	0.695053	581.063	0.238774	-0.11254	1695.58	0.280236
286	Hard bun, white	7					2137.97	0.62069	0.650453	863.161	0.252124	-3.01679	1257.74
286	Hard bun, white	8					1698.94	0.819512	0.685763	954.79	0.264352	0.324336	1061.64
286	Hard bun, white	9					1490.23	0.671127	0.699559	699.653	0.271507	0.135323	671.051
286	Hard bun, white	10					1527.56	0.72498	0.691184	765.453	0.269305	0.107819	899.258
286	Hard bun, white	11											1262.41
286	Hard bun, white	12											1079.92
286	Hard bun, white	13											921.303
286	Hard bun, white	14											1309.96
286	Hard bun, white	15											1139.19
286	Hard bun, white	16											1213.07
286	Hard bun, white	17											1147.12
286	Hard bun, white	18											1183.81
286	Hard bun, white	19											945.435
286	Hard bun, white	20											956.688
286	Hard bun, white	21
286	Hard bun, white	22
286	Hard bun, white	23
286	Hard bun, white	24
286	Hard bun, white	25
286	Hard bun, white	26
286	Hard bun, white	27
286	Hard bun, white	28
286	Hard bun, white	29
286	Hard bun, white	30
286	Hard bun, white	31
286	Hard bun, white	32
286	Hard bun, white	33
286	Hard bun, white	34
286	Hard bun, white	35
286	Hard bun, white	36
553	Soft bun, brown	1	5.1	150.922	0.170685	0.78	1012.71	0.574978	0.660071	384.349	0.254242	-0.0024155	118.078	0.35732	0.83
553	Soft bun, brown	2	5.4	157.636	0.153899	0.92	1088.02	0.487873	0.640209	339.832	0.255006	-0.545848	119.329	0.353211	0.77
553	Soft bun, brown	3	5			0.83	1181.56	0.544078	0.654744	420.911	0.2584	-0.249455	124.72	0.334243	0.82
553	Soft bun, brown	4	5				1433.25	0.446062	0.632286	404.231	0.249799	0.331912	116.947	0.324061	0.79
553	Soft bun, brown	5					1315.91	0.410256	0.597782	322.718	0.242846	0.175618	114.389	0.30625
553	Soft bun, brown	6					1138.35	0.58377	0.64504	428.65	0.251125	0.115505	138.839	0.285971
553	Soft bun, brown	7					1112.24	0.660729	0.650459	478.015	0.25017	0.43199	121.119
553	Soft bun, brown	8					1239.71	0.558991	0.646595	448.082	0.247002	0.303365	122.513
553	Soft bun, brown	9					1357.61	0.514041	0.634073	442.498	0.242646	0.0366717	134.338
553	Soft bun, brown	10					1260.63	0.527966	0.637177	424.085	0.245718	0.456474	125.192
553	Soft bun, brown	11											138.89
553	Soft bun, brown	12											212.134
553	Soft bun, brown	13											136.478
553	Soft bun, brown	14											287.339
553	Soft bun, brown	15											112.676
553	Soft bun, brown	16											86.7002
553	Soft bun, brown	17											115.289
553	Soft bun, brown	18											133.92
553	Soft bun, brown	19											132.79
553	Soft bun, brown	20											342.75
553	Soft bun, brown	21
553	Soft bun, brown	22
553	Soft bun, brown	23
553	Soft bun, brown	24
553	Soft bun, brown	25
553	Soft bun, brown	26
553	Soft bun, brown	27
553	Soft bun, brown	28
553	Soft bun, brown	29
553	Soft bun, brown	30
553	Soft bun, brown	31
553	Soft bun, brown	32
553	Soft bun, brown	33
553	Soft bun, brown	34
553	Soft bun, brown	35
553	Soft bun, brown	36
171	Soft bun, white	1	5.2	155.442	0.16199	1.05	779.416	0.641614	0.642375	321.241	0.224125	0.0640107	105.013	0.297134	1.1
171	Soft bun, white	2	4.8	155.795	0.150197	0.94	1626.97	0.432894	0.611625	430.771	0.233014	0.231613	92.5739	0.300623	1.09
171	Soft bun, white	3	5.1			0.94	1185.26	0.711523	0.637634	537.743	0.225722	0.50956	85.9536	0.298507	1.08
171	Soft bun, white	4	5				1225.48	0.588141	0.603543	435.007	0.221436	-0.334053	116.53	0.302578	1.12
171	Soft bun, white	5					1151.65	0.538346	0.592295	367.216	0.209441	-1.18321	120.109	0.283333
171	Soft bun, white	6					942.099	0.64415	0.624826	379.178	0.207014	0.255384	115.52	0.287758
171	Soft bun, white	7					828.703	0.775244	0.60155	386.464	0.19413	0.0427653	151.388
171	Soft bun, white	8					961.511	0.737194	0.603356	427.671	0.211338	0.12621	137.148
171	Soft bun, white	9					1129.49	0.535156	0.597875	361.387	0.210589	0.309788	112.05
171	Soft bun, white	10					1075.4	0.493308	0.606804	321.912	0.230856	-1.16674	112.709
171	Soft bun, white	11											73.4597
171	Soft bun, white	12											68.9144
171	Soft bun, white	13											68.5741
171	Soft bun, white	14											94.6928
171	Soft bun, white	15											87.1394
171	Soft bun, white	16											93.7816
171	Soft bun, white	17											84.9985
171	Soft bun, white	18											77.4011
171	Soft bun, white	19											105.035
171	Soft bun, white	20											60.6583
171	Soft bun, white	21
171	Soft bun, white	22
171	Soft bun, white	23
171	Soft bun, white	24
171	Soft bun, white	25
171	Soft bun, white	26
171	Soft bun, white	27
171	Soft bun, white	28
171	Soft bun, white	29
171	Soft bun, white	30
171	Soft bun, white	31
171	Soft bun, white	32
171	Soft bun, white	33
171	Soft bun, white	34
171	Soft bun, white	35
171	Soft bun, white	36
259	Ciabatta	1	5.1	155.575	0.287194	1.32	3617.23	0.75	0.663967	1801.29	0.304133	-0.199334	484.16	0.270492	0.55
259	Ciabatta	2	5.2	160.006	0.290613	1.52	2175.34	0.663798	0.695585	1004.42	0.277817	-6.97651	756.372	0.294195	0.62
259	Ciabatta	3	4.9			1.66	2376.82	0.833441	0.689006	1364.88	0.283895	-0.0048859	846.89	0.282018	0.65
259	Ciabatta	4	4.9				1328.49	0.941538	0.721939	903.02	0.276341	0.129833	555.665	0.251142	0.59
259	Ciabatta	5					2565.79	0.681495	0.68585	1199.26	0.300693	0.40811	844.234	0.242326
259	Ciabatta	6					4407.39	0.735399	0.673119	2181.71	0.319917	0.333229	648.543	0.283499
259	Ciabatta	7					2297.56	0.796925	0.702602	1286.45	0.289379	-0.491005	452.622
259	Ciabatta	8					3205.54	0.690433	0.673848	1491.37	0.289033	0.398118	535.171
259	Ciabatta	9					1337.46	0.944602	0.738026	932.4	0.302507	0.0255274	671.156
259	Ciabatta	10					814.44	0.967722	0.729495	574.952	0.281344	0.299302	646.732
259	Ciabatta	11											651.485
259	Ciabatta	12											753.551
259	Ciabatta	13											462.645
259	Ciabatta	14											490.417
259	Ciabatta	15											911.348
259	Ciabatta	16											955.663
259	Ciabatta	17											806.834
259	Ciabatta	18											627.851
259	Ciabatta	19											637.5
259	Ciabatta	20											1160.93
259	Ciabatta	21
259	Ciabatta	22
259	Ciabatta	23
259	Ciabatta	24
259	Ciabatta	25
259	Ciabatta	26
259	Ciabatta	27
259	Ciabatta	28
259	Ciabatta	29
259	Ciabatta	30
259	Ciabatta	31
259	Ciabatta	32
259	Ciabatta	33
259	Ciabatta	34
259	Ciabatta	35
259	Ciabatta	36
142	Croissant	1	5.6	149.081	0.170377	1.95	1110.15	0.941725	0.652409	682.066	0.242479	0.16892	73.1413	0.169782	0.44
142	Croissant	2	5.7	146.784	0.172975	1.79	854.208	0.893824	0.582502	444.747	0.179652	0.137738	146.821	0.145791	0.4
142	Croissant	3	6.1			1.42	506.201	0.969399	0.609449	299.063	0.204606	0.215968	102.016	0.169675	0.42
142	Croissant	4	5.7				730.183	0.961053	0.591266	414.918	0.202998	0.258184	137.796	0.192931	0.47
142	Croissant	5					1236.49	0.895855	0.638054	706.784	0.208808	0.256537	225.33	0.1529
142	Croissant	6					586.307	0.947287	0.566357	314.555	0.187636	0.0550624	454.976	0.167033
142	Croissant	7					1372.3	0.929094	0.637982	813.424	0.206134	0.0894284	180.646
142	Croissant	8					477.171	0.960374	0.62317	285.576	0.20679	0.221512	203.812
142	Croissant	9					1410.37	0.874807	0.66186	816.602	0.230654	0.0381539	124.413
142	Croissant	10					845.886	0.908319	0.504664	387.751	0.16921	0.0844876	117.156
142	Croissant	11											217.623
142	Croissant	12											219.193
142	Croissant	13											123.457
142	Croissant	14											209.828
142	Croissant	15											337.579
142	Croissant	16											213.111
142	Croissant	17											152.584
142	Croissant	18											214.483
142	Croissant	19											105.123
142	Croissant	20											140.727
142	Croissant	21
142	Croissant	22
142	Croissant	23
142	Croissant	24
142	Croissant	25
142	Croissant	26
142	Croissant	27
142	Croissant	28
142	Croissant	29
142	Croissant	30
142	Croissant	31
142	Croissant	32
142	Croissant	33
142	Croissant	34
142	Croissant	35
142	Croissant	36
