# Supplementary material for: The eating rate of bread predicted from its sensory texture and physical properties
Source: Royal Society of Chemistry journal article supplement (doi:10.1039/d4fo04297b), 2024-01-01
Supplement: d4fo04297b2.xlsx [file d4fo04297b2.xlsx]

## Sheet: Commercial breads
Participant	Session	SampleOrder	BlindingCode	Sample	Weight	Bites	Chews	Swallows	SCT	OSE	Bitesize	ER	ChewsBite	BiteDuration	ChewsGram	ChewFreq	OSEGram	Volume	BiteVolume	Liking	HardnessCrumb	DrynessCrumb	ChewinessCrumb	AdhesivenessCrumb	CompactnessCrumb	HardnessCrust	CrispinessCrust	CrumblinessCrust	Saliva incorporation	Bread type
1	2	4	123	Bread, brown	18.58	7	199	8	146.97	135.27	2.65429	7.58522	28.4286	19.3243	10.7104	1.47113	7.28041	112.352	16.0503	19	86	89	98	94	91	92	4	4	0.177857	Bread slices
2	2	2	123	Bread, brown	17.03	4	93	4	80.57	70.1	4.2575	12.6821	23.25	17.525	5.46095	1.32668	4.11627	112.352	28.088	50	29	37	62	64	58	37	37	30	0.225466	Bread slices
3	4	3	123	Bread, brown	19.18	5	230	5	165.75	155.5	3.836	6.94299	46	31.1	11.9917	1.4791	8.1074	112.352	22.4704	45	21	62	55	38	41	59	24	24	0.16924	Bread slices
4	2	2	123	Bread, brown	19.51	5	259	5	199.25	190.29	3.902	5.87503	51.8	38.058	13.2752	1.36108	9.75346	112.352	22.4704	54	28	28	37	8	26	40	41	35	0.183856	Bread slices
5	2	4	123	Bread, brown	18.05	4	161	4	115.43	108.08	4.5125	9.38231	40.25	27.02	8.91967	1.48964	5.98781	112.352	28.088	41	28	18	56	23	55	15	8	12	0.158975	Bread slices
6	4	3	123	Bread, brown	18.23	7	98	7	89	75.55	2.60429	12.2899	14	10.7929	5.37575	1.29715	4.14427	112.352	16.0503	43	12	10	14	26	14	41	9	21	0.18477	Bread slices
7	1	1	123	Bread, brown	15.8	5	94.6667	5	74.0533	66.9	3.16	12.8037	18.9333	13.38	5.99156	1.41505	4.23418	112.352	22.4704	65	25	19	20	46	28	47	43	43	0.107938	Bread slices
8	4	4	123	Bread, brown	18.45	3	76	3	56.64	52.64	6.15	19.5445	25.3333	17.5467	4.11924	1.44377	2.85312	112.352	37.4507	9	59	59	32	21	38	67	20	33	0.165887	Bread slices
9	3	3	123	Bread, brown	18.64	7	89	7	84.17	71.72	2.66286	13.2874	12.7143	10.2457	4.77468	1.24094	3.84764	112.352	16.0503	8	51	74	65	19	25	58	23	38	0.147723	Bread slices
10	2	2	123	Bread, brown	18.44	4	94	4	85.35	78.54	4.61	12.9631	23.5	19.635	5.09761	1.19684	4.25922	112.352	28.088	31	19	29	76	23	59	91	7	8	0.219777	Bread slices
11	3	1	123	Bread, brown	17.55															63	9	11	5	4	6	21	18	3	0.242205	Bread slices
12	3	4	123	Bread, brown	18.86	3	127	3	86.36	81.49	6.28667	13.1033	42.3333	27.1633	6.73383	1.55847	4.32078	112.352	37.4507	20	43	65	51	48	21	53	28	30	0.150376	Bread slices
13	4	4	123	Bread, brown	17.12	3	217	3	145.23	141.45	5.70667	7.07292	72.3333	47.15	12.6752	1.53411	8.26227	112.352	37.4507	45	6	49	49	49	12	79	3	5	0.198695	Bread slices
14	4	2	123	Bread, brown	17.9	5	154	5	125.75	115.07	3.58	8.54076	30.8	23.014	8.60335	1.33832	6.42849	112.352	22.4704	29	1	42	2	52	36	80	1	1	0.26206	Bread slices
15	4	3	123	Bread, brown	17.9	5	73	5	65.11	54.67	3.58	16.4952	14.6	10.934	4.07821	1.33528	3.05419	112.352	22.4704	60	3	2	2	6	2	2	2	2	0.164493	Bread slices
16	4	3	123	Bread, brown	19.46	8	204	8	151.75	136.2	2.4325	7.69423	25.5	17.025	10.483	1.4978	6.99897	112.352	14.044	59	14	7	5	15	36	50	49	53	0.286585	Bread slices
17	4	2	123	Bread, brown	17.76	4	112	4	88	83.14	4.44	12.1091	28	20.785	6.30631	1.34713	4.68131	112.352	28.088	59	28	13	24	17	12	69	6	12	0.174159	Bread slices
18	4	2	123	Bread, brown	16.18	9	106	9	94.82	72.37	1.79778	10.2383	11.7778	8.04111	6.5513	1.4647	4.47281	112.352	12.4836	68	5	65	8	15	22	35	5	5	0.143157	Bread slices
19	3	3	123	Bread, brown	17.93	3	182	3	125.51	119.2	5.97667	8.57143	60.6667	39.7333	10.1506	1.52685	6.64808	112.352	37.4507	7	17	93	93	22	88	10	10	58	0.161173	Bread slices
20	1	1	123	Bread, brown	20.47	8	142	8	98.9233	88.98	2.55875	12.4157	17.75	11.1225	6.93698	1.59586	4.34685	112.352	14.044	54	18	67	6	6	7	58	54	18	0.216122	Bread slices
21	3	1	123	Bread, brown	17.67	6	103	6	85.95	64.15	2.945	12.3351	17.1667	10.6917	5.82909	1.60561	3.63045	112.352	18.7253	9	64	92	73	37	28	88	56	56	0.174632	Bread slices
22	1	2	123	Bread, brown	16.48	3	77.3333	3	55.5467	52.0533	5.49333	17.8013	25.7778	17.3511	4.69256	1.48566	3.15858	112.352	37.4507	56	47	35	87	27	75	39	1	3	0.183415	Bread slices
23	3	4	123	Bread, brown	17.22	6	169	6	135.71	124.03	2.87	7.61329	28.1667	20.6717	9.81417	1.36257	7.20267	112.352	18.7253	16	1	33	3	64	77	59	5	3	0.17279	Bread slices
24	3	4	123	Bread, brown	17.89	5	178	5	137.75	123.25	3.578	7.79238	35.6	24.65	9.94969	1.44422	6.88932	112.352	22.4704	35	51	41	51	33	63	60	37	37	0.105176	Bread slices
25	2	1	123	Bread, brown	18.33	7	119	10	93.65	82.11	2.61857	11.7437	17	11.73	6.49209	1.44928	4.47954	112.352	16.0503	57	19	19	12	8	26	50	17	23	0.150925	Bread slices
26	2	3	123	Bread, brown	18.98	6	287	6	164.3	154.06	3.16333	6.93122	47.8333	25.6767	15.1212	1.86291	8.11697	112.352	18.7253	30	11	24	17	15	45	40	14	14	0.187079	Bread slices
27	3	2	123	Bread, brown	17.5	7	134	7	112.75	98.46	2.5	9.31264	19.1429	14.0657	7.65714	1.36096	5.62629	112.352	16.0503	28	23	89	50	18	18	33	11	11	0.218936	Bread slices
28	3	4	123	Bread, brown	17.96	5	225	8	183.25	165.9	3.592	5.88049	45	33.18	12.5278	1.35624	9.23719	112.352	22.4704	34	18	20	12	11	12	40	11	16	0.195438	Bread slices
29	4	4	123	Bread, brown	16.83	5	75	5	78.22	62.93	3.366	12.9097	15	12.586	4.45633	1.1918	3.73916	112.352	22.4704	71	4	9	15	16	7	66	51	30	0.137058	Bread slices
30	4	1	123	Bread, brown	16.71	5	162	5	125.75	115	3.342	7.97296	32.4	23	9.69479	1.4087	6.88211	112.352	22.4704	39	9	18	7	8	9	40	17	8	0.213792	Bread slices
31	1	4	123	Bread, brown	20.65	3	99.6667	2.33333	76.5967	74.7467	10.325	16.1759	49.6667	37.9367	4.82647	1.33339	3.61969	112.352	37.4507	52	15	21	15	62	16	20	10	29	0.168319	Bread slices
32	4	2	123	Bread, brown	18.11	3	237	3	153.88	149.33	6.03667	7.06135	79	49.7767	13.0867	1.58709	8.24572	112.352	37.4507	28	54	18	54	55	51	71	3	3	0.243407	Bread slices
33	4	3	123	Bread, brown	19.26	6	97	6	90.18	76.54	3.21	12.8144	16.1667	12.7567	5.03634	1.26731	3.97404	112.352	18.7253	37	6	41	7	23	7	52	13	25	0.144159	Bread slices
34	1	4	123	Bread, brown	19.1	11	107.667	9.66667	92.88	79.8733	1.73636	12.3385	9.78788	7.26121	5.637	1.34797	4.18185	112.352	10.2138	46	15	23	20	44	21	54	10	19	0.218936	Bread slices
35	2	1	123	Bread, brown	18.4	5	87	5	68.87	60.49	3.68	16.0302	17.4	12.098	4.72826	1.43825	3.2875	112.352	22.4704	69	30	51	41	15	26	26	24	22	0.146068	Bread slices
36	1	1	123	Bread, brown	18.28	9	139	8.33333	102	93.8867	2.03111	7.14462	15.4444	10.4319	7.60394	1.48051	5.13603	112.352	12.4836	72	8	66	3	8	10	60	13	12	0.22294	Bread slices
1	3	1	142	Croissant	26.35	8	116	8	99.27	87.27	3.29375	15.9263	14.5	10.9087	4.40228	1.32921	3.31195	147.933	18.4916	91	8	10	10	21	9	7	93	93	0.226644	Croissant
2	4	4	142	Croissant	23.55	4	106	5	90.5	82.5	5.8875	15.6133	26.5	20.625	4.50106	1.28485	3.50318	147.933	36.9832	82	19	18	7	35	16	18	67	80	0.267364	Croissant
3	3	2	142	Croissant	24.66	5	184	5	118.42	111.83	4.932	12.4945	36.8	22.366	7.46148	1.64535	4.53487	147.933	29.5865	80	22	3	10	15	10	40	80	91	0.18257	Croissant
4	4	1	142	Croissant	24.06	4	123	4	104.73	91.55	6.015	13.784	30.75	22.8875	5.11222	1.34353	3.80507	147.933	36.9832	82	30	31	27	2	94	2	95	93	0.172675	Croissant
5	2	3	142	Croissant	23.35	4	102	4	71.96	64.64	5.8375	19.4691	25.5	16.16	4.36831	1.57797	2.76831	147.933	36.9832	86	26	11	10	24	6	15	31	42	0.221588	Croissant
6	3	3	142	Croissant	24.32	6	106	6	89.41	77.55	4.05333	16.3203	17.6667	12.925	4.35855	1.36686	3.18873	147.933	24.6555	84	11	9	9	7	28	10	67	85	0.230587	Croissant
7	2	2	142	Croissant	21.51	4	61	4	44.32	39.12	5.3775	29.12	15.25	9.78	2.83589	1.5593	1.81869	147.933	36.9832	90	16	16	34	58	53	14	36	86	0.0980619	Croissant
8	1	3	142	Croissant	26.62	3	94	3	68.6133	64.8267	8.87333	23.2783	31.3333	21.6089	3.53118	1.45002	2.43526	147.933	49.3109	81	14	15	15	17	20	9	25	37	0.214339	Croissant
9	3	4	142	Croissant	25.42	6	82	6	70.76	61.42	4.23667	21.5546	13.6667	10.2367	3.22581	1.33507	2.41621	147.933	24.6555	100	1	1	12	63	34	18	82	71	0.241236	Croissant
10	3	1	142	Croissant	24.64	4	61	4	55.56	49.78	6.16	26.6091	15.25	12.445	2.47565	1.22539	2.02029	147.933	36.9832	82	2	7	4	12	14	45	72	92	0.208311	Croissant
11	1	1	142	Croissant	25.95	4	126.333	4.33333	99.76	94.49	6.4875	15.6077	31.5833	23.6225	4.86834	1.337	3.64123	147.933	36.9832	81	6	63	0	31	89	3	15	77	0.314863	Croissant
12	1	3	142	Croissant	22.12	3	116.333	3	75.8867	72.6767	7.37333	17.4898	38.7778	24.2256	5.25919	1.6007	3.28556	147.933	49.3109	71	9	15	60	73	27	57	65	75	0.281058	Croissant
13	1	2	142	Croissant	25.34	3	134	3	95.5933	90.9517	8.44667	15.9049	44.6667	30.3172	5.28808	1.47331	3.58925	147.933	49.3109	91	6	7	33	77	26	61	93	87	0.255345	Croissant
14	4	3	142	Croissant	25.45	5	128	5	106.63	69.92	5.09	14.3205	25.6	13.984	5.02947	1.83066	2.74735	147.933	29.5865	92	1	1	1	27	10	1	93	75	0.287912	Croissant
15	3	1	142	Croissant	22.97	5	76	5	63.94	51.28	4.594	21.5546	15.2	10.256	3.30866	1.48206	2.23248	147.933	29.5865	100	3	13	3	17	2	13	5	66	0.214918	Croissant
16	4	1	142	Croissant	27.71	9	178	9	138.42	113.91	3.07889	12.0113	19.7778	12.6567	6.42367	1.56264	4.11079	147.933	16.437	90	0	0	5	15	0	54	64	89	0.282516	Croissant
17	4	4	142	Croissant	25.81	4	100	4	75.61	70.32	6.4525	20.4814	25	17.58	3.87447	1.42207	2.72453	147.933	36.9832	90	12	12	11	37	3	33	72	72	0.203769	Croissant
18	2	3	142	Croissant	24.16	10	166	10	134.92	109.6	2.416	10.7441	16.6	10.96	6.87086	1.5146	4.53642	147.933	14.7933	59	5	12	11	13	4	23	88	85	0.208347	Croissant
19	3	4	142	Croissant	21.71	3	94	3	62.38	57.91	7.23667	20.8817	31.3333	19.3033	4.3298	1.62321	2.66743	147.933	49.3109	100	5	5	5	4	5	6	20	100	0.140773	Croissant
20	2	4	142	Croissant	24.08	7	122	7	81.77	68.98	3.44	17.6691	17.4286	9.85429	5.06645	1.76863	2.86462	147.933	21.1332	80	34	7	48	5	6	27	62	85	0.25325	Croissant
21	3	4	142	Croissant	27.92	5	107	5	87.7	71.88	5.584	19.1015	21.4	14.376	3.83238	1.48859	2.5745	147.933	29.5865	96	26	23	22	63	47	66	87	95	0.178924	Croissant
22	2	4	142	Croissant	20.86	4	88	4	68.33	60.76	5.215	18.317	22	15.19	4.2186	1.44832	2.91275	147.933	36.9832	87	11	8	11	83	15	15	69	77	0.334398	Croissant
23	2	4	142	Croissant	24.56	6	142	6	116.82	103.5	4.09333	12.6143	23.6667	17.25	5.78176	1.37198	4.21417	147.933	24.6555	79	3	1	1	90	30	2	36	96	0.227867	Croissant
24	2	2	142	Croissant	23.66	4	121	4	78.73	70.79	5.915	18.0312	30.25	17.6975	5.11412	1.70928	2.99197	147.933	36.9832	82	19	19	27	19	8	19	73	85	0.122172	Croissant
25	1	3	142	Croissant	23.79	6	79	6.33333	61.8067	54.3333	3.965	23.0949	13.1667	9.05556	3.32072	1.45399	2.28387	147.933	24.6555	90	5	3	4	40	1	6	28	64	0.19731	Croissant
26	2	4	142	Croissant	24.9	5	176	5	104.75	93.65	4.98	14.2625	35.2	18.73	7.06827	1.87934	3.76104	147.933	29.5865	78	14	2	2	32	6	8	38	64	0.218801	Croissant
27	1	3	142	Croissant	26.12	6	123	6.33333	107.37	95.9933	4.35333	14.5998	20.5	15.9989	4.70904	1.28134	3.67509	147.933	24.6555	82	9	9	40	77	50	11	82	100	0.299986	Croissant
28	2	4	142	Croissant	25.26	4	116	7	110.71	84.41	6.315	13.6898	29	21.1025	4.59224	1.37424	3.34165	147.933	36.9832	92	3	4	5	68	10	5	61	74	0.203603	Croissant
29	1	4	142	Croissant	24.32	4	69.6667	4	60.6233	52.1067	6.08	24.0704	17.4167	13.0267	2.86458	1.337	2.14254	147.933	36.9832	92	8	5	12	7	4	5	11	83	0.197252	Croissant
30	3	1	142	Croissant	26.55	5	126	7	105.54	94.45	5.31	15.0938	25.2	18.89	4.74576	1.33404	3.55744	147.933	29.5865	93	4	4	5	51	5	27	57	56	0.180813	Croissant
31	2	2	142	Croissant	27.06	4	83	3	58.16	54.82	6.765	27.9161	20.75	13.705	3.06726	1.51405	2.02587	147.933	36.9832	92	13	36	35	48	5	8	65	96	0.162444	Croissant
32	1	3	142	Croissant	23.33	5	254.333	5	160.817	155.267	4.666	8.70543	50.8667	31.0533	10.9016	1.63804	6.65524	147.933	29.5865	67	34	13	49	71	50	12	57	71	0.34242	Croissant
33	2	3	142	Croissant	25.61	7	114	7	102.57	87.19	3.65857	14.981	16.2857	12.4557	4.45139	1.30749	3.40453	147.933	21.1332	71	15	15	7	27	8	12	27	92	0.103488	Croissant
34	4	1	142	Croissant	24.09	9	107	9	92.25	77.25	2.67667	15.6683	11.8889	8.58333	4.44168	1.38511	3.20672	147.933	16.437	86	15	11	12	55	3	28	35	59	0.181635	Croissant
35	4	3	142	Croissant	27.78	5	104	6	80.18	68.18	5.556	20.7882	20.8	13.636	3.7437	1.52537	2.45428	147.933	29.5865	90	37	62	27	61	8	7	85	89	0.13665	Croissant
36	2	4	142	Croissant	26.94	8	183	7	123.06	112.56	3.3675	13.1351	22.875	14.07	6.79287	1.6258	4.17817	147.933	18.4916	81	2	3	3	30	7	5	83	92	0.259781	Croissant
1	3	2	171	Soft bun, white	26.42	5	123	5	92.52	83.34	5.284	17.1336	24.6	16.668	4.65556	1.47588	3.15443	155.619	31.1237	63	57	68	63	84	84	9	80	8	0.162289	Soft buns
2	3	3	171	Soft bun, white	25.13	4	119	4	103.84	89.64	6.2825	14.5204	29.75	22.41	4.73538	1.32753	3.56705	155.619	38.9047	71	7	33	2	17	9	0	0	0	0.201551	Soft buns
3	3	1	171	Soft bun, white	25.57	4	197	4	122.96	117.72	6.3925	12.4772	49.25	29.43	7.70434	1.67346	4.60383	155.619	38.9047	66	21	9	26	35	46	8	50	13	0.131528	Soft buns
4	1	2	171	Soft bun, white	25.8	5	305.667	5.66667	228.267	221.6	5.16	6.78158	61.1333	44.32	11.8475	1.37936	8.58915	155.619	31.1237	39	9	18	52	72	62	0	0	0	0.155269	Soft buns
5	4	1	171	Soft bun, white	25.36	4	107	4	79.67	73.2	6.34	19.0988	26.75	18.3	4.21924	1.46175	2.88644	155.619	38.9047	65	18	21	53	46	23	8	24	10	0.155479	Soft buns
6	2	4	171	Soft bun, white	27.31	5	109	5	99.01	89.71	5.462	16.5498	21.8	17.942	3.99121	1.21503	3.28488	155.619	31.1237	73	5	7	28	45	66	5	19	9	0.203034	Soft buns
7	2	4	171	Soft bun, white	26.37	5	80	5	55.73	49.11	5.274	28.3905	16	9.822	3.03375	1.629	1.86234	155.619	31.1237	60	14	17	56	52	65	13	14	10	0.0909315	Soft buns
8	2	3	171	Soft bun, white	24.65	3	80	3	56.61	51.77	8.21667	26.1261	26.6667	17.2567	3.24544	1.5453	2.1002	155.619	51.8729	40	18	30	58	58	58	8	8	20	0.14319	Soft buns
9	1	2	171	Soft bun, white	26.38	5	64.3333	5	58.6467	51.66	5.276	26.9896	12.8667	10.332	2.43872	1.24532	1.9583	155.619	31.1237	44	8	11	25	42	32	18	28	1	0.202198	Soft buns
10	3	2	171	Soft bun, white	27.54	5	98	5	85.72	78.81	5.508	19.2767	19.6	15.762	3.55846	1.2435	2.86166	155.619	31.1237	72	2	23	5	60	86	2	2	7	0.173699	Soft buns
11	1	3	171	Soft bun, white	26.52	4	129	4	93.0567	87.87	6.63	17.0993	32.25	21.9675	4.86425	1.46808	3.31335	155.619	38.9047	84	17	87	16	4	68	11	6	5	0.244206	Soft buns
12	2	1	171	Soft bun, white	25.26	3	121	3	79.08	75.08	8.42	19.1654	40.3333	25.0267	4.79018	1.61161	2.97229	155.619	51.8729	56	9	28	81	95	34	9	7	8	0.175906	Soft buns
13	1	3	171	Soft bun, white	22.22	3	189	3	134.073	130.89	7.40667	9.94383	63	43.63	8.50585	1.44396	5.89064	155.619	51.8729	51	4	67	69	91	47	2	2	2	0.208217	Soft buns
14	1	4	171	Soft bun, white	26.02	5	140	5	117.463	104.66	5.204	13.291	28	20.932	5.38048	1.33766	4.02229	155.619	31.1237	85	6	36	9	49	18	8	5	1	0.227745	Soft buns
15	4	4	171	Soft bun, white	26.29	5	83	5	67.5	57.88	5.258	23.3689	16.6	11.576	3.15709	1.434	2.2016	155.619	31.1237	87	1	1	1	48	10	1	1	1	0.139305	Soft buns
16	3	3	171	Soft bun, white	30.22	8	213	8	154.66	142.83	3.7775	11.7238	26.625	17.8538	7.04831	1.49128	4.72634	155.619	19.4523	62	0	0	6	27	1	11	0	0	0.24469	Soft buns
17	4	3	171	Soft bun, white	25	4	105	4	85.6	79.8	6.25	17.5234	26.25	19.95	4.2	1.31579	3.192	155.619	38.9047	76	10	10	9	35	8	1	1	4	0.152966	Soft buns
18	4	3	171	Soft bun, white	22.59	8	100	8	90.05	71.36	2.82375	15.0516	12.5	8.92	4.42674	1.40135	3.15892	155.619	19.4523	57	1	6	5	64	37	0	0	4	0.150845	Soft buns
19	4	4	171	Soft bun, white	25.71	2	86	5	60.52	58.56	12.855	25.4891	43	29.28	3.345	1.46858	2.27771	155.619	77.8094	83	20	26	26	85	73	7	8	8	0.115007	Soft buns
20	1	4	171	Soft bun, white	26.63	7	135.667	7	90.5567	81.53	3.80429	17.646	19.381	11.6471	5.0945	1.66401	3.06158	155.619	22.2312	26	11	3	11	80	15	5	8	61	0.189791	Soft buns
21	4	2	171	Soft bun, white	25.27	6	115	7	93.98	82.67	4.21167	16.1332	19.1667	13.7783	4.55085	1.39107	3.27147	155.619	25.9365	60	6	34	26	22	57	2	1	5	0.154253	Soft buns
22	2	3	171	Soft bun, white	26.2	4	74	3	57.69	47.03	6.55	27.2491	18.5	11.7575	2.82443	1.57346	1.79504	155.619	38.9047	54	18	31	62	83	31	16	5	8	0.15404	Soft buns
23	1	2	171	Soft bun, white	25.13	5	93	5	75.6733	68.9967	5.026	19.9276	18.6	13.7993	3.70076	1.34789	2.74559	155.619	31.1237	62	1	5	5	97	79	1	1	6	0.158371	Soft buns
24	3	2	171	Soft bun, white	25.79	4	107	4	71.45	62.05	6.4475	21.6571	26.75	15.5125	4.14889	1.72442	2.40597	155.619	38.9047	80	8	17	8	38	15	9	20	12	0.0748937	Soft buns
25	2	4	171	Soft bun, white	27.43	6	97	9	81.53	70.01	4.57167	20.1864	16.1667	11.6683	3.53627	1.38552	2.55231	155.619	25.9365	67	7	29	6	49	13	2	2	4	0.134517	Soft buns
26	3	1	171	Soft bun, white	24.76	5	282	7	165.69	160.08	4.952	8.96614	56.4	32.016	11.3893	1.76162	6.46527	155.619	31.1237	57	10	21	63	35	63	8	37	23	0.158327	Soft buns
27	2	4	171	Soft bun, white	24.43	5	131	6	99.03	90.35	4.886	14.8016	26.2	18.07	5.36226	1.44992	3.69832	155.619	31.1237	34	15	30	42	76	10	11	12	11	0.196706	Soft buns
28	1	1	171	Soft bun, white	27.51	6	119	6	90.5267	81.4333	4.585	18.2318	19.8333	13.5722	4.3257	1.46132	2.96014	155.619	25.9365	81	10	13	13	35	46	7	22	5	0.163676	Soft buns
29	3	2	171	Soft bun, white	27.95	4	70	4	62.75	52.25	6.9875	26.7251	17.5	13.0625	2.50447	1.33971	1.86941	155.619	38.9047	71	9	8	51	61	62	8	8	9	0.147325	Soft buns
30	2	2	171	Soft bun, white	24.46	6	148	6	114.66	101.15	4.07667	12.7996	24.6667	16.8583	6.0507	1.46317	4.13532	155.619	25.9365	70	9	9	10	28	55	8	12	10	0.188035	Soft buns
31	3	4	171	Soft bun, white	26.95	4	104	3	70.84	67.92	6.7375	22.8261	26	16.98	3.859	1.53121	2.52022	155.619	38.9047	14	6	7	15	75	54	8	7	19	0.139686	Soft buns
32	2	2	171	Soft bun, white	24.61	3	252	5	154.1	149.17	8.20333	9.58209	84	49.7233	10.2397	1.68935	6.06136	155.619	51.8729	57	40	50	65	52	69	3	6	6	0.235233	Soft buns
33	4	4	171	Soft bun, white	23.57	5	79	5	73.47	62.07	4.714	19.2487	15.8	12.414	3.35172	1.27276	2.63343	155.619	31.1237	57	4	19	13	40	70	5	6	20	0.127927	Soft buns
34	3	1	171	Soft bun, white	24.91	7	102	7	81.66	64.57	3.55857	18.3027	14.5714	9.22429	4.09474	1.57968	2.59213	155.619	22.2312	69	10	29	12	58	16	15	10	13	0.137824	Soft buns
35	2	4	171	Soft bun, white	28.62	5	106	6	82.47	76.04	5.724	20.8221	21.2	15.208	3.7037	1.394	2.65688	155.619	31.1237	63	4	23	69	55	17	1	0	36	0.131195	Soft buns
36	2	1	171	Soft bun, white	28.05	6	154	6	114.79	103.04	4.675	14.6616	25.6667	17.1733	5.4902	1.49457	3.67344	155.619	25.9365	80	4	12	16	57	56	9	66	2	0.193053	Soft buns
1	3	3	259	Ciabatta	38.18	9	247	9	196.2	176.79	4.24222	11.6758	27.4444	19.6433	6.46936	1.39714	4.63043	157.791	17.5323	82	60	31	63	77	76	71	28	19	0.196742	Ciabatta
2	4	1	259	Ciabatta	42.76	9	213	9	196	173.13	4.75111	13.0898	23.6667	19.2367	4.98129	1.23029	4.04888	157.791	17.5323	61	51	30	19	35	59	70	78	77	0.265621	Ciabatta
3	1	2	259	Ciabatta	41.26	9.33333	478.333	11	367.773	356.659	4.43163	6.73158	51.6111	38.3115	11.5931	1.34115	8.64419	157.791	16.9061	62	19	9	58	56	40	40	70	51	0.162563	Ciabatta
4	2	4	259	Ciabatta	32.41	6	287	7	223.47	204.16	5.40167	8.70184	47.8333	34.0267	8.85529	1.40576	6.29929	157.791	26.2984	81	50	8	51	29	8	71	62	52	0.192282	Ciabatta
5	3	2	259	Ciabatta	37.58	6	190	6	129.67	120.44	6.26333	17.3888	31.6667	20.0733	5.05588	1.57755	3.2049	157.791	26.2984	81	19	7	57	59	27	45	59	25	0.160092	Ciabatta
6	3	1	259	Ciabatta	40.09	9	191	9	168.67	150.83	4.45444	14.261	21.2222	16.7589	4.76428	1.26633	3.76228	157.791	17.5323	76	37	8	63	41	63	76	47	34	0.221271	Ciabatta
7	3	1	259	Ciabatta	46.46	9	158	9	114.91	100.75	5.16222	24.259	17.5556	11.1944	3.40077	1.56824	2.16853	157.791	17.5323	86	39	17	76	73	78	56	77	40	0.12292	Ciabatta
8	2	2	259	Ciabatta	44.84	5	120	5	91.75	84.11	8.968	29.3232	24	16.822	2.67618	1.4267	1.87578	157.791	31.5581	71	55	30	73	46	76	55	42	17	0.190916	Ciabatta
9	2	2	259	Ciabatta	46.32	8	112	10	121.72	95.21	5.79	22.8327	14	11.9012	2.41796	1.17635	2.05548	157.791	19.7238	94	1	0	1	71	77	49	11	9	0.209218	Ciabatta
10	4	1	259	Ciabatta	40.46	7	167	8	149.75	137.13	5.78	16.211	23.8571	19.59	4.12753	1.21782	3.38927	157.791	22.5415	68	8	9	9	46	33	78	57	24	0.183785	Ciabatta
11	3	3	259	Ciabatta	38.95															69	18	4	10	23	28	45	30	15	0.27145	Ciabatta
12	3	3	259	Ciabatta	42.87	4	158	4	111.02	104.96	10.7175	23.1688	39.5	26.24	3.68556	1.50534	2.44833	157.791	39.4476	65	11	27	43	59	22	78	61	27	0.182398	Ciabatta
13	3	1	259	Ciabatta	38.69	5	210	5	149.46	140.49	7.738	15.5319	42	28.098	5.42776	1.49477	3.63117	157.791	31.5581	82	33	17	16	31	9	73	88	78	0.206579	Ciabatta
14	3	1	259	Ciabatta	42.71	8	248	8	207.28	185.25	5.33875	12.363	31	23.1562	5.8066	1.33873	4.33739	157.791	19.7238	81	61	9	5	51	34	72	91	9	0.294181	Ciabatta
15	3	2	259	Ciabatta	36.85	7	162	7	141.35	121.29	5.26429	15.642	23.1429	17.3271	4.3962	1.33564	3.29145	157.791	22.5415	90	3	3	10	10	38	81	82	60	0.176714	Ciabatta
16	2	4	259	Ciabatta	43.22	10	301	11	224.51	200.43	4.322	11.5505	30.1	20.043	6.96437	1.50177	4.63744	157.791	15.7791	74	18	22	34	6	38	63	46	2	0.295003	Ciabatta
17	2	1	259	Ciabatta	40.38	6	181	8	136.82	127.2	6.73	17.7079	30.1667	21.2	4.48242	1.42296	3.15007	157.791	26.2984	81	54	27	62	27	62	41	76	38	0.195248	Ciabatta
18	1	1	259	Ciabatta	35.28	10	167	10	144.563	124.78	3.528	14.6428	16.7	12.478	4.73356	1.33836	3.53685	157.791	15.7791	77	23	23	16	56	59	33	65	31	0.252757	Ciabatta
19	1	1	259	Ciabatta	39.48	5	125	5.66667	93.7233	86.14	7.896	25.2745	25	17.228	3.16616	1.45113	2.18186	157.791	31.5581	82	9	9	9	16	8	19	20	19	0.172866	Ciabatta
20	3	3	259	Ciabatta	46.68	11	249	11	181.56	157.98	4.24364	15.4263	22.6364	14.3618	5.33419	1.57615	3.38432	157.791	14.3446	77	5	2	62	18	29	65	41	33	0.214216	Ciabatta
21	1	2	259	Ciabatta	39.47	7	185.667	7	155.82	136.19	5.63857	15.1983	26.5238	19.4557	4.70399	1.36329	3.45047	157.791	22.5415	81	40	18	33	25	58	66	88	19	0.158703	Ciabatta
22	3	3	259	Ciabatta	34.21	5	133	5	109.4	96.06	6.842	18.7623	26.6	19.212	3.88775	1.38455	2.80795	157.791	31.5581	90	26	16	18	38	31	67	75	35	0.183742	Ciabatta
23	3	2	259	Ciabatta	40.13	7	204	7	175.98	158.13	5.73286	13.6822	29.1429	22.59	5.08348	1.29008	3.94044	157.791	22.5415	51	15	2	10	84	32	51	3	3	0.189687	Ciabatta
24	1	1	259	Ciabatta	38.9	6.66667	233.667	7.66667	169.307	157.51	5.86587	13.7857	35.2063	23.7562	6.00686	1.4835	4.0491	157.791	23.6686	81	29	51	41	53	32	51	72	30	0.168616	Ciabatta
25	4	2	259	Ciabatta	40.4	9	199	15	174	155.64	4.48889	13.931	22.1111	17.2933	4.92574	1.27859	3.85248	157.791	17.5323	75	24	5	15	47	7	67	41	49	0.202489	Ciabatta
26	1	1	259	Ciabatta	35.98	6	403	9	270.893	260.003	5.99667	7.9692	67.1667	43.3339	11.2007	1.54998	7.22633	157.791	26.2984	61	40	29	72	73	24	40	62	43	0.229641	Ciabatta
27	2	3	259	Ciabatta	43.17	9	256	10	191.91	173.84	4.79667	13.497	28.4444	19.3156	5.93004	1.47262	4.02687	157.791	17.5323	72	38	72	59	15	63	68	34	34	0.248699	Ciabatta
28	2	1	259	Ciabatta	39.21	8	226	10	193.49	157.16	4.90125	12.1588	28.25	19.645	5.76384	1.43802	4.00816	157.791	19.7238	88	51	24	77	21	10	79	77	17	0.202583	Ciabatta
29	1	1	259	Ciabatta	40.15	7	163.667	7	146.577	126.223	5.73571	16.4352	23.381	18.0319	4.07638	1.29664	3.14379	157.791	22.5415	76	14	8	11	33	48	14	57	62	0.191267	Ciabatta
30	3	2	259	Ciabatta	45.48	8	281	12	247.5	222.25	5.685	11.0255	35.125	27.7812	6.17854	1.26434	4.88676	157.791	19.7238	59	16	11	20	21	24	71	70	48	0.178162	Ciabatta
31	1	3	259	Ciabatta	39.38	6.66667	142	6	113.19	109.02	5.93825	20.8747	21.4048	16.4523	3.60589	1.30251	2.76841	157.791	23.6686	82	21	28	29	32	21	74	79	91	0.180305	Ciabatta
32	4	1	259	Ciabatta	49.52	5	412	7	264	253.09	9.904	11.2545	82.4	50.618	8.31987	1.62788	5.11086	157.791	31.5581	66	55	11	53	19	54	32	24	1	0.254285	Ciabatta
33	1	2	259	Ciabatta	45.45	8	169.667	8	151.437	132.12	5.68125	18.0075	21.2083	16.515	3.73304	1.28419	2.90693	157.791	19.7238	40	28	59	71	42	68	38	17	29	0.124505	Ciabatta
34	1	1	259	Ciabatta	42.64	12	170.667	10.6667	148.453	128.253	3.55333	17.2338	14.2222	10.6878	4.0025	1.3307	3.00782	157.791	13.1492	80	30	24	22	39	30	51	61	18	0.189348	Ciabatta
35	4	2	259	Ciabatta	42.5	8	172	8	150.25	130.47	5.3125	16.9717	21.5	16.3087	4.04706	1.31831	3.06988	157.791	19.7238	60	81	48	81	63	60	71	63	36	0.117149	Ciabatta
36	3	4	259	Ciabatta	45.49	9	151	9	168.91	159.26	5.05444	16.1589	16.7778	17.6956	3.31941	0.948135	3.50099	157.791	17.5323	83	17	9	19	14	67	82	82	25	0.230872	Ciabatta
1	4	2	286	Hard bun, white	37.92	8	188	8	178.5	158.73	4.74	12.7462	23.5	19.8412	4.95781	1.1844	4.18592	144.237	18.0296	92	49	8	62	95	50	70	30	94	0.213608	Hard rolls
2	1	3	286	Hard bun, white	38.15	8	195	8.33333	179.32	164.387	4.76875	12.7657	24.375	20.5483	5.1114	1.18623	4.30896	144.237	18.0296	66	33	36	14	45	54	60	81	78	0.281801	Hard rolls
3	3	3	286	Hard bun, white	41.84	8	462	8	312.92	297.74	5.23	8.0225	57.75	37.2175	11.0421	1.55169	7.11616	144.237	18.0296	45	71	63	59	33	66	87	45	61	0.154073	Hard rolls
4	4	3	286	Hard bun, white	39.79	6	240	6	206	188.46	6.63167	11.5893	40	31.41	6.03167	1.27348	4.73637	144.237	24.0395	71	61	19	72	16	90	72	69	92	0.19338	Hard rolls
5	4	4	286	Hard bun, white	37.37	7	215	8	167.5	152.67	5.33857	13.3863	30.7143	21.81	5.75328	1.40827	4.08536	144.237	20.6053	81	14	16	49	46	10	83	57	70	0.1759	Hard rolls
6	3	4	286	Hard bun, white	37.59	8	161	8	152.41	130.88	4.69875	14.7982	20.125	16.36	4.28305	1.23013	3.48178	144.237	18.0296	62	19	39	61	65	74	69	78	75	0.222696	Hard rolls
7	4	3	286	Hard bun, white	37.62	8	144	8	112.13	97.07	4.7025	20.1302	18	12.1337	3.82775	1.48347	2.58028	144.237	18.0296	65	29	13	60	62	71	33	64	52	0.1249	Hard rolls
8	3	1	286	Hard bun, white	35.52	6	173	6	133.92	119.64	5.92	15.914	28.8333	19.94	4.8705	1.446	3.36824	144.237	24.0395	71	66	73	81	62	84	80	66	72	0.183742	Hard rolls
9	1	4	286	Hard bun, white	39.12	9	151.667	9	148.133	130.293	4.34667	15.8455	16.8519	14.477	3.87696	1.16404	3.33061	144.237	16.0263	70	20	38	79	85	64	66	77	69	0.243725	Hard rolls
10	3	3	286	Hard bun, white	41.12	6	146	6	141.23	129.98	6.85333	17.4694	24.3333	21.6633	3.55058	1.12325	3.16099	144.237	24.0395	67	6	21	5	62	74	82	58	70	0.211197	Hard rolls
11	4	4	286	Hard bun, white	36.93	6	202	6	157.63	142.27	6.155	14.057	33.6667	23.7117	5.46981	1.41984	3.85242	144.237	24.0395	51	5	4	10	2	25	28	55	14	0.253972	Hard rolls
12	2	4	286	Hard bun, white	37.21	5	207	5	156.15	146.58	7.442	14.2978	41.4	29.316	5.56302	1.4122	3.93926	144.237	28.8474	57	10	8	71	77	27	95	74	62	0.170442	Hard rolls
13	3	2	286	Hard bun, white	38.22	6	256	6	179.6	169.43	6.37	12.7684	42.6667	28.2383	6.69806	1.51095	4.43302	144.237	24.0395	71	23	47	24	48	49	66	81	77	0.214379	Hard rolls
14	2	1	286	Hard bun, white	38.37	8	225	9	202.9	182.19	4.79625	11.3465	28.125	22.7737	5.86396	1.23497	4.74824	144.237	18.0296	83	13	3	2	54	18	86	59	71	0.2813	Hard rolls
15	2	3	286	Hard bun, white	39.92	7	137	7	130.54	112.17	5.70286	18.3484	19.5714	16.0243	3.43186	1.22136	2.80987	144.237	20.6053	87	6	6	11	16	17	71	59	28	0.183599	Hard rolls
16	1	3	286	Hard bun, white	42.83	11	320.333	11	288.803	256.67	3.89364	8.89811	29.1212	23.3336	7.47918	1.24804	5.99276	144.237	13.1125	81	29	10	8	31	51	72	80	12	0.272458	Hard rolls
17	3	3	286	Hard bun, white	36.93	5	173	5	125	116.89	7.386	17.7264	34.6	23.378	4.68454	1.48002	3.16518	144.237	28.8474	71	45	14	63	29	28	57	65	33	0.152143	Hard rolls
18	2	2	286	Hard bun, white	39.14	11	202	11	162.31	138.41	3.55818	14.4686	18.3636	12.5827	5.16096	1.45943	3.53628	144.237	13.1125	61	31	37	35	66	47	43	61	50	0.201021	Hard rolls
19	3	1	286	Hard bun, white	40.98	6	176	6	137.72	117.83	6.83	17.8536	29.3333	19.6383	4.29478	1.49368	2.87531	144.237	24.0395	92	9	14	11	23	7	81	83	58	0.180578	Hard rolls
20	1	2	286	Hard bun, white	33.03	8	168.333	8	127.16	112.783	4.12875	15.5904	21.0417	14.0979	5.09638	1.49254	3.41457	144.237	18.0296	76	7	2	33	32	3	68	69	4	0.254607	Hard rolls
21	2	4	286	Hard bun, white	42.2	7	218	10	198.61	171.69	6.02857	12.7486	31.1429	24.5271	5.16588	1.26973	4.06848	144.237	20.6053	81	36	33	38	49	52	67	70	72	0.201679	Hard rolls
22	4	1	286	Hard bun, white	42.9	4	117	7	107.75	92.53	10.725	23.8886	29.25	23.1325	2.72727	1.26445	2.15688	144.237	36.0592	84	18	29	43	51	25	83	89	57	0.190206	Hard rolls
23	3	1	286	Hard bun, white	42.69	6	176	6	160.11	139.87	7.115	15.9978	29.3333	23.3117	4.12275	1.25831	3.27641	144.237	24.0395	58	24	9	49	89	88	87	92	26	0.190353	Hard rolls
24	1	2	286	Hard bun, white	38.69	7	289	7.66667	215.85	199.773	5.52714	10.7547	41.2857	28.539	7.46963	1.44664	5.16344	144.237	20.6053	61	40	52	64	63	63	60	42	51	0.165533	Hard rolls
25	4	3	286	Hard bun, white	36.54	8	169	13	144.38	128	4.5675	15.1849	21.125	16	4.62507	1.32031	3.50301	144.237	18.0296	71	28	10	14	54	51	77	57	61	0.182651	Hard rolls
26	3	2	286	Hard bun, white	36.37	6	426	9	251.81	237.34	6.06167	8.66606	71	39.5567	11.713	1.79489	6.52571	144.237	24.0395	67	29	11	40	22	21	71	71	68	0.206638	Hard rolls
27	2	1	286	Hard bun, white	39.27	8	240	11	199.99	178.3	4.90875	11.7816	30	22.2875	6.11154	1.34605	4.54036	144.237	18.0296	81	44	43	44	79	84	93	92	93	0.239051	Hard rolls
28	1	4	286	Hard bun, white	40.5733	8	226.333	8.66667	209.673	176.033	5.07167	11.6126	28.2917	22.0042	5.57838	1.28574	4.33865	144.237	18.0296	82	43	43	52	51	59	69	78	79	0.221759	Hard rolls
29	1	2	286	Hard bun, white	39.96	7	157.333	7	136.567	119.298	5.70857	17.5565	22.4762	17.04	3.93727	1.31883	2.98543	144.237	20.6053	61	46	15	85	34	41	43	58	73	0.20597	Hard rolls
30	2	1	286	Hard bun, white	37.38	7	223	9	192.09	172.61	5.34	11.6758	31.8571	24.6586	5.96576	1.29193	4.61771	144.237	20.6053	90	9	10	9	47	16	52	71	53	0.233646	Hard rolls
31	3	1	286	Hard bun, white	40.65	6	144	6	108.91	103.14	6.775	22.3946	24	17.19	3.54244	1.39616	2.53727	144.237	24.0395	81	20	29	62	62	17	87	87	87	0.190342	Hard rolls
32	2	3	286	Hard bun, white	37.9	5	404	7	260.29	252.04	7.58	8.73641	80.8	50.408	10.6596	1.60292	6.65013	144.237	28.8474	78	54	29	76	30	80	62	67	44	0.276529	Hard rolls
33	2	1	286	Hard bun, white	34.14	6	116	6	125.92	105.77	5.69	16.2675	19.3333	17.6283	3.39777	1.09672	3.09813	144.237	24.0395	60	19	12	10	40	41	62	40	60	0.119218	Hard rolls
34	2	3	286	Hard bun, white	37.55	12	182	12	157.27	139.78	3.12917	14.3257	15.1667	11.6483	4.84687	1.30205	3.7225	144.237	12.0197	57	48	52	50	48	38	58	52	66	0.166459	Hard rolls
35	3	3	286	Hard bun, white	39.13	8	191	8	157.89	142.19	4.89125	14.8698	23.875	17.7737	4.88117	1.34327	3.63378	144.237	18.0296	75	80	51	86	84	68	59	76	45	0.165413	Hard rolls
36	1	4	286	Hard bun, white	38.16	8	227.333	8	159.317	149.777	4.77	14.3726	28.4167	18.7221	5.95737	1.51782	3.92497	144.237	18.0296	84	11	9	18	18	30	84	8	4	0.236312	Hard rolls
1	3	4	489	Bread, white water based	18.89	7	159	7	119.64	110.68	2.69857	9.47342	22.7143	15.8114	8.41715	1.43657	5.85918	105.888	15.1269	50	29	50	29	74	49	90	6	7	0.160377	Bread slices
2	1	4	489	Bread, white water based	17.71	5	111.667	5	93.6433	85.63	3.542	11.3479	22.3333	17.126	6.30529	1.30406	4.83512	105.888	21.1776	60	0	76	4	41	1	31	21	8	0.242314	Bread slices
3	3	4	489	Bread, white water based	15.92	6	203	6	130.83	122.93	2.65333	7.30108	33.8333	20.4883	12.7513	1.65135	7.72173	105.888	17.648	56	36	38	13	30	53	33	35	7	0.127591	Bread slices
4	2	1	489	Bread, white water based	16.61	4	174	4	134.92	128.17	4.1525	7.3866	43.5	32.0425	10.4756	1.35757	7.71644	105.888	26.472	72	20	11	11	27	71	63	9	31	0.176303	Bread slices
5	3	4	489	Bread, white water based	18.69	4	121	4	85.65	78.5	4.6725	13.0928	30.25	19.625	6.47405	1.5414	4.20011	105.888	26.472	53	11	16	75	62	63	12	8	13	0.137359	Bread slices
6	4	4	489	Bread, white water based	15.63	6	77	6	74.2	60.67	2.605	12.6388	12.8333	10.1117	4.92642	1.26916	3.88164	105.888	17.648	31	16	3	22	20	40	55	8	8	0.143094	Bread slices
7	4	2	489	Bread, white water based	15.29	4	58	4	47.68	41.59	3.8225	19.2408	14.5	10.3975	3.79333	1.39457	2.72008	105.888	26.472	8	12	61	39	42	50	5	5	6	0.104772	Bread slices
8	2	4	489	Bread, white water based	15.15	3	75	3	54.45	49.68	5.05	16.6942	25	16.56	4.9505	1.50966	3.27921	105.888	35.2961	19	65	74	74	64	74	68	19	34	0.189237	Bread slices
9	4	3	489	Bread, white water based	15.73	6	64	6	66.89	64.9	2.62167	14.1097	10.6667	10.8167	4.06866	0.986133	4.12587	105.888	17.648	19	1	1	2	70	57	69	2	1	0.177694	Bread slices
10	3	4	489	Bread, white water based	16.79	4	78	4	77.46	69.15	4.1975	13.0054	19.5	17.2875	4.64562	1.12798	4.11852	105.888	26.472	53	5	2	6	71	74	56	8	27	0.18618	Bread slices
11	4	1	489	Bread, white water based	17.85	3	126	4	97.91	92.06	5.95	10.9386	42	30.6867	7.05882	1.36867	5.15742	105.888	35.2961	40	8	5	5	28	3	56	16	2	0.233875	Bread slices
12	4	2	489	Bread, white water based	16.57	3	73	3	51.17	47.61	5.52333	19.4294	24.3333	15.87	4.40555	1.53329	2.87326	105.888	35.2961	59	4	28	25	54	38	12	16	18	0.164519	Bread slices
13	1	1	489	Bread, white water based	16.42	4	140.667	3.66667	107.903	103.463	4.105	9.13088	35.1667	25.8658	8.56679	1.35958	6.30106	105.888	26.472	81	18	19	21	77	78	74	16	23	0.196147	Bread slices
14	1	2	489	Bread, white water based	18.2	5	126.333	5	104.847	92.7233	3.64	10.4153	25.2667	18.5447	6.94139	1.36248	5.09469	105.888	21.1776	81	11	7	13	60	3	86	6	19	0.303073	Bread slices
15	3	3	489	Bread, white water based	18.25	6	74	6	70.81	55.07	3.04167	15.4639	12.3333	9.17833	4.05479	1.34374	3.01753	105.888	17.648	72	2	2	2	10	10	29	2	3	0.150745	Bread slices
16	3	1	489	Bread, white water based	17.89	8	175	8	140.28	128.45	2.23625	7.65184	21.875	16.0562	9.782	1.3624	7.17999	105.888	13.236	50	0	17	0	0	3	64	70	66	0.280214	Bread slices
17	2	4	489	Bread, white water based	19.22	3	93	3	67	62.71	6.40667	17.2119	31	20.9033	4.83871	1.48302	3.26275	105.888	35.2961	66	26	18	66	35	47	17	8	20	0.142749	Bread slices
18	3	2	489	Bread, white water based	16.57	9	124	9	99.17	84.48	1.84111	10.0252	13.7778	9.38667	7.4834	1.4678	5.09837	105.888	11.7654	59	3	10	3	15	29	58	2	3	0.148224	Bread slices
19	2	1	489	Bread, white water based	17.44	3	99	3	69	65.54	5.81333	15.1652	33	21.8467	5.67661	1.51053	3.75803	105.888	35.2961	67	29	29	29	42	30	66	62	59	0.148003	Bread slices
20	2	1	489	Bread, white water based	18.1	8	127	8	88.74	74.76	2.2625	12.238	15.875	9.345	7.01657	1.69877	4.13039	105.888	13.236	60	18	39	1	29	4	79	4	4	0.185127	Bread slices
21	4	1	489	Bread, white water based	16.85	5	102	5	89.5	76	3.37	11.2961	20.4	15.2	6.05341	1.34211	4.51039	105.888	21.1776	54	14	60	45	62	36	54	42	57	0.168034	Bread slices
22	1	4	489	Bread, white water based	17.29	3	74.3333	3	58.63	52.9133	5.76333	17.7055	24.7778	17.6378	4.29921	1.40481	3.06034	105.888	35.2961	37	25	27	30	61	42	80	24	29	0.154279	Bread slices
23	3	3	489	Bread, white water based	16.54	5	133	5	106.15	97.62	3.308	9.34903	26.6	19.524	8.04111	1.36243	5.90206	105.888	21.1776	17	3	0	93	92	96	16	2	1	0.146146	Bread slices
24	4	3	489	Bread, white water based	14.97	4	102	4	68.5	62.8	3.7425	13.1124	25.5	15.7	6.81363	1.6242	4.19506	105.888	26.472	71	30	38	52	32	52	70	29	17	0.130098	Bread slices
25	3	4	489	Bread, white water based	17.02	7	109	8	91.8	78.4	2.43143	11.1242	15.5714	11.2	6.40423	1.39031	4.60635	105.888	15.1269	45	29	64	17	39	27	67	37	34	0.120092	Bread slices
26	1	4	489	Bread, white water based	16.31	5	292	5.66667	185.43	175.667	3.262	5.27754	58.4	35.1333	17.9031	1.66224	10.7705	105.888	21.1776	30	3	34	33	43	35	2	1	1	0.226817	Bread slices
27	3	1	489	Bread, white water based	17.82	6	135	6	113.73	98.89	2.97	9.40121	22.5	16.4817	7.57576	1.36515	5.54938	105.888	17.648	8	23	54	92	81	14	59	76	23	0.211216	Bread slices
28	1	3	489	Bread, white water based	16.1767	7	123.667	7	103.67	90.3867	2.31095	6.02495	17.6667	12.9124	7.64476	1.3682	5.58747	105.888	15.1269	50	21	23	24	32	48	49	10	35	0.158848	Bread slices
29	2	1	489	Bread, white water based	17.1	4	74	4	69.26	60.58	4.275	14.8137	18.5	15.145	4.32749	1.22153	3.54269	105.888	26.472	56	1	6	15	30	55	27	42	4	0.135106	Bread slices
30	4	2	489	Bread, white water based	17.34	5	162	6	132.38	123.82	3.468	7.85919	32.4	24.764	9.34256	1.30835	7.14072	105.888	21.1776	61	9	8	7	25	9	29	10	11	0.193166	Bread slices
31	3	2	489	Bread, white water based	18.24	5	82	3	62.79	58.39	3.648	17.4295	16.4	11.678	4.49561	1.40435	3.20121	105.888	21.1776	67	10	26	47	35	23	41	31	11	0.144278	Bread slices
32	3	4	489	Bread, white water based	16.67	2	192	2	116.86	113.09	8.335	8.55896	96	56.545	11.5177	1.69776	6.78404	105.888	52.9441	40	30	57	66	57	64	54	16	16	0.244891	Bread slices
33	1	3	489	Bread, white water based	16.01	5	66.6667	5	59.2033	53.66	3.202	16.2256	13.3333	10.732	4.16406	1.24239	3.35166	105.888	21.1776	24	4	26	7	61	17	18	7	18	0.117915	Bread slices
34	1	2	489	Bread, white water based	17.79	9	91.6667	8	79.8267	69.16	1.97667	13.3715	10.1852	7.68444	5.15271	1.32543	3.88758	105.888	11.7654	57	21	25	22	59	22	37	8	17	0.188751	Bread slices
35	4	1	489	Bread, white water based	17.1	5	55	5	47.13	38.13	3.42	21.7696	11	7.626	3.21637	1.44243	2.22982	105.888	21.1776	74	22	22	21	20	21	40	30	30	0.116888	Bread slices
36	3	3	489	Bread, white water based	18.98	7	127	6	84.45	78.79	2.71143	13.4849	18.1429	11.2557	6.69125	1.61188	4.15121	105.888	15.1269	57	2	9	5	10	3	7	7	9	0.193133	Bread slices
1	2	1	553	Soft bun, brown	23.24	5	140	8	110.24	99.84	4.648	12.6488	28	19.968	6.0241	1.40224	4.29604	154.279	30.8558	71	41	50	61	85	86	9	70	9	0.149507	Soft buns
2	3	2	553	Soft bun, brown	27.11	5	127	5	109.36	95.17	5.422	14.8738	25.4	19.034	4.68462	1.33445	3.51051	154.279	30.8558	67	10	25	0	8	6	14	0	0	0.196578	Soft buns
3	1	1	553	Soft bun, brown	24.19	6	330.333	8.66667	239.96	233.873	4.10846	6.04863	57.1159	39.7291	13.6558	1.41245	9.66818	154.279	25.7131	2	9	93	71	96	53	2	1	1	0.107468	Soft buns
4	3	2	553	Soft bun, brown	25.48	5	246	5	175.89	168.6	5.096	8.6918	49.2	33.72	9.65463	1.45907	6.61695	154.279	30.8558	64	14	31	57	26	33	9	4	5	0.174721	Soft buns
5	2	2	553	Soft bun, brown	28.31	4	124	5	87.38	80.08	7.0775	19.4392	31	20.02	4.38008	1.54845	2.82868	154.279	38.5697	70	17	16	44	44	15	6	16	14	0.165555	Soft buns
6	1	4	553	Soft bun, brown	24.5	6	128	6.33333	111.667	102.763	4.08333	13.1643	21.3333	17.1272	5.22449	1.24558	4.19442	154.279	25.7131	76	18	46	17	58	73	9	9	8	0.190602	Soft buns
7	3	2	553	Soft bun, brown	25.63	5	107	5	71.71	65.46	5.126	21.4447	21.4	13.092	4.1748	1.63459	2.55404	154.279	30.8558	25	24	57	41	63	31	6	7	9	0.0836956	Soft buns
8	3	2	553	Soft bun, brown	26.09	3	100	3	72.86	69.199	8.69667	21.485	33.3333	23.0663	3.83289	1.44511	2.65232	154.279	51.4263	18	20	45	50	13	33	19	10	12	0.105802	Soft buns
9	3	2	553	Soft bun, brown	25.01	6	74	6	64.17	55.9	4.16833	23.3848	12.3333	9.31667	2.95882	1.32379	2.23511	154.279	25.7131	94	4	8	29	42	62	13	20	2	0.178423	Soft buns
10	1	3	553	Soft bun, brown	24.57	5	123	5	113.893	105.1	4.914	12.9444	24.6	21.02	5.00611	1.17031	4.27757	154.279	30.8558	71	0	28	7	57	25	0	1	8	0.158362	Soft buns
11	1	2	553	Soft bun, brown	26.86	4	162	4	117.98	109.917	6.715	13.66	40.5	27.4792	6.03127	1.47384	4.09221	154.279	38.5697	36	16	56	8	18	79	16	4	2	0.215895	Soft buns
12	4	3	553	Soft bun, brown	25.15	3	98	3	63.28	59.78	8.38333	23.8464	32.6667	19.9267	3.89662	1.63934	2.37694	154.279	51.4263	51	4	32	30	46	46	11	29	17	0.133689	Soft buns
13	2	4	553	Soft bun, brown	23.92	3	182	4	124.22	119.77	7.97333	11.5537	60.6667	39.9233	7.6087	1.51958	5.00711	154.279	51.4263	50	23	74	77	71	23	12	9	10	0.173759	Soft buns
14	4	4	553	Soft bun, brown	27.56	5	175	5	138.63	132.5	5.512	11.9282	35	26.5	6.34978	1.32075	4.80769	154.279	30.8558	61	31	71	23	65	81	1	1	1	0.213294	Soft buns
15	2	4	553	Soft bun, brown	25.12	5	81	5	74.53	57.95	5.024	20.2227	16.2	11.59	3.22452	1.39776	2.30693	154.279	30.8558	81	5	4	3	25	3	4	4	4	0.140378	Soft buns
16	1	1	553	Soft bun, brown	24.59	9	249	9	218.813	198.027	2.73222	6.74276	27.6667	22.003	10.1261	1.25741	8.05314	154.279	17.1421	79	8	29	28	36	37	6	6	1	0.239564	Soft buns
17	3	2	553	Soft bun, brown	28.19	3	148	4	101.67	95.57	9.39667	16.6362	49.3333	31.8567	5.25009	1.5486	3.39021	154.279	51.4263	27	54	30	54	37	26	1	1	1	0.119413	Soft buns
18	1	2	553	Soft bun, brown	26.86	8	113.667	8	98.5667	83.1533	3.3575	16.3504	14.2083	10.3942	4.23182	1.36695	3.09581	154.279	19.2849	74	7	8	3	79	71	0	2	10	0.168127	Soft buns
19	1	4	553	Soft bun, brown	24.7	3	144.667	3.66667	95.51	92.02	8.23333	15.5167	48.2222	30.6733	5.85695	1.57212	3.72551	154.279	51.4263	72	9	17	17	28	33	9	11	10	0.139256	Soft buns
20	4	1	553	Soft bun, brown	26.75	6	153	6	101.36	91	4.45833	15.8346	25.5	15.1667	5.71963	1.68132	3.40187	154.279	25.7131	60	10	23	26	27	41	3	4	19	0.159434	Soft buns
21	3	3	553	Soft bun, brown	26.16	5	96	5	75.83	64.55	5.232	20.6989	19.2	12.91	3.66972	1.48722	2.46751	154.279	30.8558	72	20	17	19	44	43	6	6	16	0.176872	Soft buns
22	3	1	553	Soft bun, brown	26.39	3	76	3	59.19	51.01	8.79667	26.7511	25.3333	17.0033	2.87988	1.4899	1.93293	154.279	51.4263	67	15	38	54	60	64	22	15	12	0.112686	Soft buns
23	2	1	553	Soft bun, brown	27.67	5	121	5	97.69	84.56	5.534	16.9946	24.2	16.912	4.37297	1.43094	3.05602	154.279	30.8558	60	6	4	22	90	81	22	31	4	0.148812	Soft buns
24	2	1	553	Soft bun, brown	22.52	4	165	4	106.83	98.37	5.63	12.6481	41.25	24.5925	7.32682	1.67734	4.36812	154.279	38.5697	51	19	51	71	62	29	29	70	29	0.0732356	Soft buns
25	3	2	553	Soft bun, brown	24.73	6	120	8	99.6	84.4	4.12167	14.8976	20	14.0667	4.85241	1.4218	3.41286	154.279	25.7131	67	15	12	18	35	30	3	2	11	0.134523	Soft buns
26	4	2	553	Soft bun, brown	26.32	4	190	5	119	109.63	6.58	13.2706	47.5	27.4075	7.21884	1.7331	4.16527	154.279	38.5697	39	9	16	28	53	42	1	10	2	0.161081	Soft buns
27	3	4	553	Soft bun, brown	23.4	5	100	6	99.46	91.18	4.68	14.1162	20	18.236	4.2735	1.09673	3.89658	154.279	30.8558	75	13	14	13	81	14	13	14	13	0.173455	Soft buns
28	4	2	553	Soft bun, brown	25.26	5	262	8	204	181.89	5.052	7.42941	52.4	36.378	10.3721	1.44043	7.20071	154.279	30.8558	61	8	22	18	32	54	0	5	3	0.170853	Soft buns
29	4	3	553	Soft bun, brown	25.63	5	85	5	84.77	72.95	5.126	18.1409	17	14.59	3.31643	1.16518	2.84627	154.279	30.8558	80	3	10	55	71	80	3	3	6	0.105828	Soft buns
30	2	3	553	Soft bun, brown	26.21	6	267	10	200.83	189.2	4.36833	7.8305	44.5	31.5333	10.187	1.41121	7.21862	154.279	25.7131	40	19	32	20	13	23	21	10	11	0.142867	Soft buns
31	1	2	553	Soft bun, brown	27.01	5.33333	103	3	77.0933	74.8633	5.78786	21.0228	22.246	16.1128	3.8134	1.37584	2.77169	154.279	28.9273	71	2	27	13	59	9	28	8	19	0.157932	Soft buns
32	2	4	553	Soft bun, brown	24.59	2	252	3	141.24	139.09	12.295	10.446	126	69.545	10.2481	1.81178	5.65636	154.279	77.1394	28	49	74	61	20	78	5	4	6	0.243715	Soft buns
33	3	4	553	Soft bun, brown	27.08	5	109	5	103.03	90.35	5.416	15.7702	21.8	18.07	4.02511	1.20642	3.33641	154.279	30.8558	43	16	24	28	48	63	3	1	20	0.161333	Soft buns
34	4	4	553	Soft bun, brown	26.08	7	104	7	85.43	67.83	3.72571	18.3168	14.8571	9.69	3.98773	1.53324	2.60084	154.279	22.0398	67	9	30	25	41	30	5	6	6	0.115196	Soft buns
35	4	4	553	Soft bun, brown	26.5834	4.66667	62.7333	4.46667	125.482	53.2513	5.69645	12.711	13.4429	11.411	2.35987	1.17806	2.00318	154.279	33.0597	59	50	31	67	73	50	2	1	8	0.0811759	Soft buns
36	4	3	553	Soft bun, brown	26.6006	4.58788	48.8	4.33333	125.537	44.6681	5.79802	12.7137	10.6367	9.73612	1.83454	1.0925	1.67921	154.279	33.6275	66	4	13	8	63	45	8	33	4	0.188781	Soft buns
1	4	4	645	Bread, wholemeal	19.01	6	213	7	155.88	148.25	3.16833	7.31717	35.5	24.7083	11.2046	1.43676	7.79853	112.536	18.756	43	29	30	80	48	70	70	19	5	0.162541	Bread slices
2	2	3	645	Bread, wholemeal	19.49	4	120	4	100.24	89.52	4.8725	11.666	30	22.38	6.157	1.34048	4.59312	112.536	28.134	28	24	40	58	69	27	28	29	19	0.235448	Bread slices
3	4	1	645	Bread, wholemeal	16.81	4	190	4	128.38	123.18	4.2025	7.85636	47.5	30.795	11.3028	1.54246	7.32778	112.536	28.134	30	36	54	39	5	56	66	8	3	0.129789	Bread slices
4	1	3	645	Bread, wholemeal	17.39	6	404.667	6.66667	298.737	257.177	2.89833	3.49271	67.4444	42.8628	23.2701	1.5735	14.7888	112.536	18.756	25	29	61	81	34	47	30	20	62	0.171538	Bread slices
5	1	3	645	Bread, wholemeal	20.01	5	172.667	5	127.91	88.4533	4.002	9.38668	34.5333	17.6907	8.62902	1.95207	4.42046	112.536	22.5072	55	54	54	76	60	36	71	71	48	0.176337	Bread slices
6	4	1	645	Bread, wholemeal	18.37	7	103	7	94.98	80.87	2.62429	11.6045	14.7143	11.5529	5.60697	1.27365	4.40229	112.536	16.0766	41	10	20	11	70	49	9	6	11	0.203426	Bread slices
7	3	4	645	Bread, wholemeal	18.3	6	123	6	82.93	77.21	3.05	13.2401	20.5	12.8683	6.72131	1.59306	4.21913	112.536	18.756	21	26	61	61	19	69	19	16	16	0.0840545	Bread slices
8	2	1	645	Bread, wholemeal	18.38	3	61	3	52.91	43.57	6.12667	20.8429	20.3333	14.5233	3.31882	1.40005	2.37051	112.536	37.512	76	20	35	20	19	18	35	50	39	0.193892	Bread slices
9	4	1	645	Bread, wholemeal	18.98	7	83	7	78.82	65.18	2.71143	14.4481	11.8571	9.31143	4.37302	1.2734	3.43414	112.536	16.0766	70	2	8	3	53	15	66	1	1	0.144582	Bread slices
10	4	2	645	Bread, wholemeal	19.55	5	128	5	112.27	103.91	3.91	10.448	25.6	20.782	6.54731	1.23184	5.31509	112.536	22.5072	48	13	60	61	13	65	5	3	3	0.165914	Bread slices
11	4	3	645	Bread, wholemeal	18.96	4	148	4	105.88	95.88	4.74	10.7442	37	23.97	7.80591	1.5436	5.05696	112.536	28.134	27	2	15	2	6	3	7	1	1	0.222064	Bread slices
12	1	4	645	Bread, wholemeal	17.08	4	155.667	4	104.84	99.05	4.27	9.77508	38.9167	24.7625	9.11397	1.5716	5.79918	112.536	28.134	50	40	54	31	66	73	76	45	46	0.205808	Bread slices
13	4	1	645	Bread, wholemeal	17.76	4	218	4	141.5	138	4.44	7.53074	54.5	34.5	12.2748	1.57971	7.77027	112.536	28.134	18	7	81	81	79	14	82	8	8	0.19123	Bread slices
14	4	1	645	Bread, wholemeal	17.25	5	148	5	117.8	108.75	3.45	8.78608	29.6	21.75	8.57971	1.36092	6.30435	112.536	22.5072	73	2	0	1	34	1	62	3	30	0.243567	Bread slices
15	1	4	645	Bread, wholemeal	18.25	5	66	5	62.8033	50.82	3.65	17.4364	13.2	10.164	3.61644	1.2987	2.78466	112.536	22.5072	71	10	20	9	23	10	10	10	10	0.164357	Bread slices
16	3	2	645	Bread, wholemeal	18.87	8	216	8	164.63	150.64	2.35875	6.87724	27	18.83	11.4467	1.43388	7.98304	112.536	14.067	45	4	2	6	15	8	58	55	26	0.290625	Bread slices
17	2	2	645	Bread, wholemeal	18.15	3	116	3	79.5	75.22	6.05	13.6981	38.6667	25.0733	6.39118	1.54214	4.14435	112.536	37.512	65	31	24	43	30	26	39	46	26	0.126926	Bread slices
18	2	4	645	Bread, wholemeal	18.58	8	132	8	96.98	82.55	2.3225	11.4952	16.5	10.3187	7.10441	1.59903	4.44295	112.536	14.067	71	12	70	11	14	17	75	24	8	0.133776	Bread slices
19	4	1	645	Bread, wholemeal	18.24	3	147	4	101.5	98.09	6.08	10.7823	49	32.6967	8.05921	1.49862	5.37774	112.536	37.512	49	61	90	91	68	66	41	40	7	0.169889	Bread slices
20	4	3	645	Bread, wholemeal	16.95	7	164	7	117.64	103.94	2.42143	8.64502	23.4286	14.8486	9.67552	1.57783	6.13215	112.536	16.0766	43	3	8	5	12	5	7	5	7	0.177703	Bread slices
21	1	1	645	Bread, wholemeal	19.77	4	137.333	4.66667	107.75	96.66	4.9425	11.009	34.3333	24.165	6.94655	1.42079	4.88923	112.536	28.134	60	9	82	6	7	57	50	40	19	0.0989616	Bread slices
22	4	3	645	Bread, wholemeal	19.52	3	79	4	58	54.61	6.50667	20.1931	26.3333	18.2033	4.04713	1.44662	2.79764	112.536	37.512	52	15	29	53	53	53	42	26	14	0.15647	Bread slices
23	2	3	645	Bread, wholemeal	18.66	7	185	7	148.79	130.86	2.66571	7.5247	26.4286	18.6943	9.91426	1.41372	7.01286	112.536	16.0766	45	3	80	46	2	1	77	36	45	0.166347	Bread slices
24	4	2	645	Bread, wholemeal	18.11	4	130	4	88.13	81.13	4.5275	12.3295	32.5	20.2825	7.17835	1.60237	4.47985	112.536	28.134	39	29	42	13	25	24	17	17	32	0.101141	Bread slices
25	2	2	645	Bread, wholemeal	18.07	6	103	10	88.73	76.56	3.01167	12.2191	17.1667	12.76	5.70006	1.34535	4.23686	112.536	18.756	50	27	50	19	8	31	50	13	31	0.150721	Bread slices
26	2	2	645	Bread, wholemeal	20.22	5	227	5	130.07	120.03	4.044	9.32729	45.4	24.006	11.2265	1.89119	5.9362	112.536	22.5072	19	14	39	52	25	51	51	2	3	0.174921	Bread slices
27	4	4	645	Bread, wholemeal	18.56	7	158	9	131.38	118.8	2.65143	8.47618	22.5714	16.9714	8.51293	1.32997	6.40086	112.536	16.0766	28	28	84	66	24	49	78	20	45	0.198531	Bread slices
28	4	3	645	Bread, wholemeal	18.96	5	314	8	247.75	240.38	3.792	4.59173	62.8	48.076	16.5612	1.30627	12.6783	112.536	22.5072	8	10	38	30	8	37	26	8	19	0.180451	Bread slices
29	3	3	645	Bread, wholemeal	20.52	5	98	5	88.69	76.62	4.104	13.8821	19.6	15.324	4.77583	1.27904	3.73392	112.536	22.5072	24	8	19	9	14	9	35	8	8	0.143861	Bread slices
30	3	4	645	Bread, wholemeal	18.91	6	244	7	189.25	174.25	3.15167	5.99524	40.6667	29.0417	12.9032	1.40029	9.2147	112.536	18.756	18	18	38	30	8	11	29	10	17	0.164666	Bread slices
31	2	1	645	Bread, wholemeal	19.1	4	103	4	74.44	71.21	4.775	15.3949	25.75	17.8025	5.39267	1.44643	3.72827	112.536	28.134	59	29	48	22	27	20	18	6	22	0.137768	Bread slices
32	3	3	645	Bread, wholemeal	18.55	3	260	4	149.67	145.35	6.18333	7.43636	86.6667	48.45	14.0162	1.78879	7.83558	112.536	37.512	30	19	53	52	49	46	49	12	14	0.241532	Bread slices
33	2	4	645	Bread, wholemeal	15.08	5	93	5	81.68	69.74	3.016	11.0774	18.6	13.948	6.16711	1.33352	4.62467	112.536	22.5072	24	7	54	14	26	7	40	29	35	0.110137	Bread slices
34	4	2	645	Bread, wholemeal	18.38	11	121	11	103.3	90	1.67091	10.6757	11	8.18182	6.58324	1.34444	4.89663	112.536	10.2306	35	17	43	18	13	27	38	3	5	0.143849	Bread slices
35	1	2	645	Bread, wholemeal	19.25	6	90.6667	6	67.9367	60.02	3.20833	17.0017	15.1111	10.0033	4.70996	1.51061	3.11792	112.536	18.756	70	20	28	34	13	30	21	19	25	0.162003	Bread slices
36	2	3	645	Bread, wholemeal	17.59	9	210	9	147.39	133.84	1.95444	7.16059	23.3333	14.8711	11.9386	1.56904	7.60887	112.536	12.504	20	14	70	21	15	46	81	23	74	0.198843	Bread slices
1	1	1	840	Hard bun, brown	38	8	188	8.66667	164.573	151.563	4.75	13.8548	23.5	18.9454	4.94737	1.24041	3.98851	167.891	20.9864	81	18	29	19	29	18	61	61	50	0.219879	Hard rolls
2	2	4	840	Hard bun, brown	36.9	8	216	8	205.79	173.96	4.6125	10.7585	27	21.745	5.85366	1.24166	4.71436	167.891	20.9864	60	40	34	67	75	52	79	82	88	0.272571	Hard rolls
3	2	2	840	Hard bun, brown	41.06	7	378	8	271.86	256.45	5.86571	9.06202	54	36.6357	9.20604	1.47397	6.24574	167.891	23.9845	65	24	11	31	39	35	65	66	55	0.192432	Hard rolls
4	3	3	840	Hard bun, brown	38.37	6	307	6	225.22	206.59	6.395	10.222	51.1667	34.4317	8.00104	1.48604	5.38415	167.891	27.9819	71	28	21	35	7	30	81	83	57	0.204171	Hard rolls
5	1	4	840	Hard bun, brown	36.08	6	207.333	6	153.953	142.76	6.01333	14.0626	34.5556	23.7933	5.74649	1.45232	3.95676	167.891	27.9819	81	27	14	36	48	44	73	74	50	0.211221	Hard rolls
6	3	2	840	Hard bun, brown	39.25	9	175	9	166.21	142.42	4.36111	14.1688	19.4444	15.8244	4.4586	1.22876	3.62854	167.891	18.6546	64	37	26	49	25	50	65	71	79	0.235319	Hard rolls
7	2	1	840	Hard bun, brown	40.82	8	141	8	113.16	94.92	5.1025	21.6437	17.625	11.865	3.45419	1.48546	2.32533	167.891	20.9864	80	20	19	60	40	62	68	79	34	0.133481	Hard rolls
8	1	2	840	Hard bun, brown	37.87	6	196.333	6.66667	165.093	148.377	6.31167	13.7631	32.7222	24.7294	5.1844	1.32321	3.91805	167.891	27.9819	71	35	70	71	60	62	81	69	62	0.230085	Hard rolls
9	4	4	840	Hard bun, brown	37.23	8	128	8	137.5	107.39	4.65375	16.2458	16	13.4238	3.43809	1.19192	2.8845	167.891	20.9864	90	5	3	5	70	77	82	60	52	0.20486	Hard rolls
10	1	1	840	Hard bun, brown	34.73	6	135.333	7	131.84	119.1	5.78833	15.8089	22.5556	19.85	3.89673	1.1363	3.42931	167.891	27.9819	72	5	62	30	0	43	81	91	62	0.215671	Hard rolls
11	4	2	840	Hard bun, brown	36.01	6	194	6	152.4	142.38	6.00167	14.1772	32.3333	23.73	5.38739	1.36255	3.9539	167.891	27.9819	38	20	20	27	0	64	60	44	19	0.277438	Hard rolls
12	3	1	840	Hard bun, brown	39.24	5	144	5	112.38	103.55	7.848	20.9503	28.8	20.71	3.66972	1.39063	2.63889	167.891	33.5782	71	9	11	58	65	42	82	84	66	0.166128	Hard rolls
13	2	3	840	Hard bun, brown	37.3	5	231	6	166.78	157.25	7.46	13.4189	46.2	31.45	6.19303	1.469	4.21582	167.891	33.5782	78	52	27	26	25	23	56	83	86	0.22952	Hard rolls
14	2	4	840	Hard bun, brown	38.53	8	259	8	236.81	211.94	4.81625	9.76226	32.375	26.4925	6.72203	1.22204	5.50065	167.891	20.9864	72	46	14	14	41	3	87	73	86	0.295837	Hard rolls
15	4	2	840	Hard bun, brown	39.59	7	153	8	138	116.5	5.65571	17.213	21.8571	16.6429	3.86461	1.3133	2.94266	167.891	23.9845	82	10	9	18	19	47	30	18	18	0.194681	Hard rolls
16	4	4	840	Hard bun, brown	39.97	10	267	10	205.75	175	3.997	11.6559	26.7	17.5	6.68001	1.52571	4.37828	167.891	16.7891	80	38	27	36	57	60	86	56	64	0.300501	Hard rolls
17	1	1	840	Hard bun, brown	39.58	7	170	5.66667	135.73	129.363	5.65429	17.4967	24.2857	18.4805	4.2951	1.31413	3.2684	167.891	23.9845	76	42	63	31	21	10	60	72	29	0.1938	Hard rolls
18	2	1	840	Hard bun, brown	40.34	11	215	11	174.44	149.98	3.66727	13.8753	19.5455	13.6345	5.3297	1.43352	3.7179	167.891	15.2628	79	53	47	58	18	52	67	74	67	0.213399	Hard rolls
19	4	3	840	Hard bun, brown	36.96	5	125	5	107	86.73	7.392	20.7252	25	17.346	3.38203	1.44125	2.34659	167.891	33.5782	100	38	52	6	5	15	91	100	80	0.174144	Hard rolls
20	3	1	840	Hard bun, brown	37.58	9	192	9	142.4	125.71	4.17556	15.8343	21.3333	13.9678	5.1091	1.52732	3.34513	167.891	18.6546	77	18	6	10	15	12	67	66	24	0.235594	Hard rolls
21	2	3	840	Hard bun, brown	38.6	7	214	9	179.25	152.71	5.51429	12.9205	30.5714	21.8157	5.54404	1.40135	3.95622	167.891	23.9845	84	30	17	30	36	60	65	60	46	0.223506	Hard rolls
22	3	4	840	Hard bun, brown	35.94	5	147	5	117.36	102.86	7.188	18.3742	29.4	20.572	4.09015	1.42913	2.86199	167.891	33.5782	78	36	33	34	60	41	73	72	29	0.18191	Hard rolls
23	2	2	840	Hard bun, brown	38.23	7	189	7	157.28	140.45	5.46143	14.5842	27	20.0643	4.94376	1.34567	3.67382	167.891	23.9845	82	11	2	4	51	77	77	85	2	0.218277	Hard rolls
24	2	3	840	Hard bun, brown	38.44	6	271	6	200.63	179.39	6.40667	11.4958	45.1667	29.8983	7.04995	1.51068	4.66675	167.891	27.9819	40	40	50	61	51	50	64	51	29	0.125329	Hard rolls
25	1	2	840	Hard bun, brown	39.38	9	145.333	77.6667	165.627	151.45	4.37556	14.2659	16.1481	16.8278	3.69054	0.959613	3.84586	167.891	18.6546	74	35	8	13	19	36	63	69	52	0.233364	Hard rolls
26	3	3	840	Hard bun, brown	38.79	6	521	10	302.26	289.78	6.465	7.69999	86.8333	48.2967	13.4313	1.79792	7.47048	167.891	27.9819	41	29	30	51	62	64	61	51	52	0.211496	Hard rolls
27	1	4	840	Hard bun, brown	41.49	10	260.667	10.3333	215.9	195.407	4.149	11.5308	26.0667	19.5407	6.28264	1.33397	4.70973	167.891	16.7891	61	38	73	73	74	75	93	96	53	0.282197	Hard rolls
28	4	1	840	Hard bun, brown	36.88	6	214	9	190.75	166.22	6.14667	11.6005	35.6667	27.7033	5.8026	1.28745	4.50705	167.891	27.9819	79	40	8	68	62	66	77	82	80	0.239729	Hard rolls
29	4	2	840	Hard bun, brown	36.23	7	154	7	148	126.6	5.17571	14.6878	22	18.0857	4.25062	1.21643	3.49434	167.891	23.9845	65	55	29	81	70	82	90	69	71	0.183746	Hard rolls
30	4	3	840	Hard bun, brown	40	8	278	10	221.75	205.3	5	10.823	34.75	25.6625	6.95	1.35412	5.1325	167.891	20.9864	60	19	9	9	19	21	60	63	29	0.235568	Hard rolls
31	2	4	840	Hard bun, brown	35.42	6	163	6	124.08	115.01	5.90333	17.1277	27.1667	19.1683	4.60192	1.41727	3.24704	167.891	27.9819	82	37	48	21	18	38	82	85	70	0.208159	Hard rolls
32	4	4	840	Hard bun, brown	38.38	5	398	9	246	233.35	7.676	9.36098	79.6	46.67	10.37	1.70559	6.07999	167.891	33.5782	55	68	37	68	58	64	68	65	42	0.276112	Hard rolls
33	1	1	840	Hard bun, brown	35.08	8	151.667	8	143.827	120.29	4.385	14.6344	18.9583	15.0363	4.32345	1.26084	3.42902	167.891	20.9864	61	30	61	18	72	60	72	37	50	0.186636	Hard rolls
34	1	3	840	Hard bun, brown	39.29	12	170.333	11.3333	150.053	131.813	3.27417	15.7104	14.1944	10.9844	4.33528	1.29223	3.35488	167.891	13.9909	68	42	47	40	26	48	54	42	41	0.210265	Hard rolls
35	2	3	840	Hard bun, brown	41	8	212	10	173.55	158.39	5.125	14.1746	26.5	19.7987	5.17073	1.33847	3.86317	167.891	20.9864	86	61	47	77	77	54	76	88	72	0.169751	Hard rolls
36	3	2	840	Hard bun, brown	34.09	7	214	7	151.25	139.29	4.87	13.5233	30.5714	19.8986	6.2775	1.53636	4.08595	167.891	23.9845	88	18	5	15	27	70	7	46	11	0.219444	Hard rolls
